# Supplementary material for: Immunotherapeutic Value of MAP1LC3C and Its Candidate FDA-Approved Drugs Identified by Pan-Cancer Analysis, Virtual Screening and Sensitivity Analysis
Source: Frontiers journal article supplement (doi:10.3389/fphar.2022.863856), 2022-03-02
Supplement: Data_Sheet_1.ZIP [file Table S1. The list of immunomodulator.xlsx]

## Sheet: immunomodulator
B2M	MHC	B2M
HLA-A	MHC	HLA-A
HLA-B	MHC	HLA-B
HLA-C	MHC	HLA-C
HLA-DMA	MHC	HLA-DMA
HLA-DMB	MHC	HLA-DMB
HLA-DOA	MHC	HLA-DOA
HLA-DOB	MHC	HLA-DOB
HLA-DPA1	MHC	HLA-DPA1
HLA-DPB1	MHC	HLA-DPB1
HLA-DQA1	MHC	HLA-DQA1
HLA-DQA2	MHC	HLA-DQA2
HLA-DQB1	MHC	HLA-DQB1
HLA-DRA	MHC	HLA-DRA
HLA-DRB1	MHC	HLA-DRB1
HLA-E	MHC	HLA-E
HLA-F	MHC	HLA-F
HLA-G	MHC	HLA-G
TAP1	MHC	TAP1
TAP2	MHC	TAP2
TAPBP	MHC	TAPBP
A2aR	Immunoinhibitor	ADORA2A
CD272	Immunoinhibitor	BTLA
CD160	Immunoinhibitor	CD160
SLAMF4	Immunoinhibitor	CD244
PD-L1	Immunoinhibitor	CD274
CD96	Immunoinhibitor	CD96
CSF1R	Immunoinhibitor	CSF1R
CTLA-4	Immunoinhibitor	CTLA4
TIM3	Immunoinhibitor	HAVCR2
IDO1	Immunoinhibitor	IDO1
IL10	Immunoinhibitor	IL10
IL10RB	Immunoinhibitor	IL10RB
VEGFR	Immunoinhibitor	KDR
KIR2DL1	Immunoinhibitor	KIR2DL1
KIR2DL3	Immunoinhibitor	KIR2DL3
LAG3	Immunoinhibitor	LAG3
LGALS9	Immunoinhibitor	LGALS9
PD-1	Immunoinhibitor	PDCD1
PD-L2	Immunoinhibitor	PDCD1LG2
CD112	Immunoinhibitor	PVRL2
TGFB1	Immunoinhibitor	TGFB1
TGFBR1	Immunoinhibitor	TGFBR1
TIGIT	Immunoinhibitor	TIGIT
B7-H4	Immunoinhibitor	VTCN1
BTNL2	Immunostimulator	BTNL2
VISTA	Immunostimulator	C10orf54
CD27	Immunostimulator	CD27
B7-H3	Immunostimulator	CD276
CD28	Immunostimulator	CD28
CD40	Immunostimulator	CD40
CD40LG	Immunostimulator	CD40LG
CD48	Immunostimulator	CD48
CD70	Immunostimulator	CD70
B7.1	Immunostimulator	CD80
B7.2	Immunostimulator	CD86
CXCL12	Immunostimulator	CXCL12
CXCR4	Immunostimulator	CXCR4
CD39	Immunostimulator	ENTPD1
B7-H7	Immunostimulator	HHLA2
ICOS	Immunostimulator	ICOS
B7-H2	Immunostimulator	ICOSLG
CD25	Immunostimulator	IL2RA
IL6	Immunostimulator	IL6
IL6R	Immunostimulator	IL6R
NKG2A	Immunostimulator	KLRC1
NKG2D	Immunostimulator	KLRK1
LTA	Immunostimulator	LTA
MICB	Immunostimulator	MICB
CD73	Immunostimulator	NT5E
CD155	Immunostimulator	PVR
RAET1E	Immunostimulator	RAET1E
STING	Immunostimulator	TMEM173
TMIGD2	Immunostimulator	TMIGD2
CD267	Immunostimulator	TNFRSF13B
BAFF-R	Immunostimulator	TNFRSF13C
HVEM	Immunostimulator	TNFRSF14
BCMA	Immunostimulator	TNFRSF17
GITR	Immunostimulator	TNFRSF18
DR3	Immunostimulator	TNFRSF25
OX40	Immunostimulator	TNFRSF4
CD30	Immunostimulator	TNFRSF8
4-1BB	Immunostimulator	TNFRSF9
APRIL	Immunostimulator	TNFSF13
BAFF	Immunostimulator	TNFSF13B
LIGHT	Immunostimulator	TNFSF14
TL1A	Immunostimulator	TNFSF15
GITRL	Immunostimulator	TNFSF18
OX-40L	Immunostimulator	TNFSF4
4-1BB-L	Immunostimulator	TNFSF9
ULBP1	Immunostimulator	ULBP1
