# Supplementary material for: Immunotherapeutic Value of MAP1LC3C and Its Candidate FDA-Approved Drugs Identified by Pan-Cancer Analysis, Virtual Screening and Sensitivity Analysis
Source: Frontiers journal article supplement (doi:10.3389/fphar.2022.863856), 2022-03-02
Supplement: Data_Sheet_1.ZIP [file Table S3. Correlation between immune cells and MAP1LC3C expression in 22 of 33 cancer types (P-value).xlsx]

## Sheet: CIBERSORTcor.result
CancerType	Gene	B cells naive	B cells memory	Plasma cells	T cells CD8	T cells CD4 naive	T cells CD4 memory resting	T cells CD4 memory activated	T cells follicular helper	T cells regulatory (Tregs)	T cells gamma delta	NK cells resting	NK cells activated	Monocytes	Macrophages M0	Macrophages M1	Macrophages M2	Dendritic cells resting	Dendritic cells activated	Mast cells resting	Mast cells activated	Eosinophils	Neutrophils
ACC	MAP1LC3C	0.970555	0.224983	0.498668	0.750796	1	0.123329	0.700659	0.413067	0.346909	0.451055	0.559385	0.0139918	0.817465	0.0907375	0.37274	0.204628	0.623477	0.999127	0.617741	0.128759	0.629172	0.420919
BLCA	MAP1LC3C	1.14909e-05	0.000145759	0.35247	0.468929	1	0.169504	0.244418	0.00762267	0.0271874	0.392596	0.181782	0.98066	0.0208541	0.441316	0.726065	3.88666e-08	0.0833896	4.36886e-07	0.604114	0.359839	0.114587	0.142831
BRCA	MAP1LC3C	2.58821e-46	0.0506045	0.000759653	2.43489e-08	1	2.37709e-05	0.189135	0.00179983	0.00213535	2.30705e-05	1	0.174522	0.136103	2.56998e-28	0.0202289	3.12691e-18	1.08511e-11	0.423061	0.000962821	1	1	1.47723e-12
CESC	MAP1LC3C	0.401971	0.549198	0.203415	0.709786	1	0.320918	0.981246	0.14339	0.100169	0.440113	0.0564129	0.660222	0.273641	0.235544	0.860318	0.153507	0.340026	0.011246	0.143087	0.198817	1	0.412663
CHOL	MAP1LC3C	0.0689197	0.505747	0.633765	0.0211085	1	0.94848	0.191168	0.0258585	0.0641716	1	1	0.233642	0.791329	0.18722	0.313446	0.124133	0.256436	0.765556	0.90462	0.807137	1	0.742525
COAD	MAP1LC3C	0.00157551	0.10103	0.0612243	0.32211	1	0.0413216	0.573496	0.3215	0.351515	1	0.0151157	0.94876	0.0151544	0.000377159	0.0486367	0.000246101	0.00736328	0.940906	0.0249459	0.0271888	0.00349948	0.0702917
DLBC	MAP1LC3C	0.751887	0.0527243	1	0.134066	1	0.0524675	0.279123	0.0216123	0.409414	0.138432	1	0.384125	0.0723655	0.0494479	0.926482	0.75746	0.000274851	0.868745	0.048322	1	1	1
ESCA	MAP1LC3C	0.00193247	0.711129	0.205745	0.269322	1	0.996917	0.851363	0.416063	0.386842	1	0.142882	0.236621	0.736199	0.0019424	0.00854477	0.160007	0.583622	0.000538839	0.0176157	0.0150582	1	0.716359
GBM	MAP1LC3C	0.811049	0.613847	0.125534	0.24644	1	0.0293476	0.0700286	0.947162	1	0.156999	0.312169	0.878312	0.287847	0.0111931	0.359572	0.00687767	0.909507	1	0.60259	0.349415	0.523951	0.594059
HNSC	MAP1LC3C	1.1595e-13	0.011324	0.040774	0.00143164	1	0.580239	0.121613	0.383121	0.000405358	1	4.87778e-05	0.204835	0.000202807	2.18761e-12	0.813293	0.000446523	0.706717	3.86726e-08	1.82393e-05	0.0225129	1	0.636556
KICH	MAP1LC3C	0.702149	1	0.0124214	0.493378	1	0.863755	1	0.861049	0.615189	0.632945	0.302815	0.0874529	0.556667	0.757162	0.117261	0.376794	0.606368	0.940741	0.26375	1	0.0169952	0.10927
KIRC	MAP1LC3C	0.225866	0.0360441	0.778556	0.200027	1	0.345499	0.570972	0.197584	0.830992	0.184787	0.248869	6.93136e-05	0.542359	0.000143738	0.459966	0.283494	0.154775	0.271348	0.0132462	1	1	0.00278483
KIRP	MAP1LC3C	0.337693	0.899159	0.00509548	0.363488	1	0.00301356	0.718759	0.419591	0.791191	1	1	0.953258	0.806226	1.70157e-05	0.00471565	0.000607995	0.756283	0.00131581	4.2958e-11	0.756095	1	0.258317
LAML	MAP1LC3C	0.278904	0.190052	0.0168857	0.405147	0.895014	0.943498	0.709042	1	1	0.280863	0.0675807	0.239742	0.308559	1	1	0.431306	1	1	0.269421	1	0.379208	0.134299
LGG	MAP1LC3C	0.303364	0.213996	1	5.75732e-05	1	2.41163e-09	1	0.00284142	1	1	0.0450901	0.43493	1.53334e-09	7.83067e-07	7.47576e-14	0.00122928	0.446173	1	0.0294514	2.49464e-05	0.984952	1.58772e-08
LIHC	MAP1LC3C	0.000713329	1	0.578217	0.0940646	1	6.67663e-06	0.0607217	0.00738914	0.825318	0.0432832	0.884265	0.00329055	0.488583	0.504212	0.858729	0.747018	0.0336431	0.46975	0.93371	1	0.0882388	0.504254
LUAD	MAP1LC3C	0.134457	0.198806	2.20448e-07	0.365147	1	0.00119548	0.0538427	0.386335	0.804483	0.0651606	1	0.0356834	8.73012e-13	3.31263e-08	0.0353044	5.89761e-05	4.85606e-10	0.00889487	6.43692e-07	1	0.174469	0.916219
LUSC	MAP1LC3C	0.511826	0.163669	0.941241	0.673813	1	0.000189774	0.00630195	0.149559	0.14818	1	0.208227	0.318269	0.000176175	5.36804e-06	0.898034	2.199e-07	0.116698	0.16351	0.00771843	0.000197313	0.537299	8.84221e-05
MESO	MAP1LC3C	0.116803	0.182203	0.0120274	0.817491	1	0.0318166	0.373767	0.209285	0.36558	1	1	0.344734	0.0339732	0.794917	0.380651	0.0103412	0.982681	0.378386	0.00526024	1	1	0.161772
OV	MAP1LC3C	0.00264665	0.000196341	0.900532	0.938622	1	0.961174	0.424435	0.450545	0.295737	0.968708	1	0.00327294	0.322167	0.408105	0.595659	0.311378	0.255603	0.0873656	0.505724	0.829246	1	0.190695
PAAD	MAP1LC3C	1.02903e-08	7.78872e-05	0.045591	0.000213912	1	0.0549754	1.98944e-07	0.767777	0.0460072	1	0.101938	2.05605e-05	4.60993e-05	1.47822e-08	0.692857	0.0282441	0.0823055	0.399596	0.207368	1	1	0.804476
PCPG	MAP1LC3C	0.0461485	0.631642	0.576151	0.964468	1	0.0799048	0.634787	0.582681	0.60741	1	0.468948	0.0396848	0.702477	0.769687	0.497714	0.0183145	0.99297	0.0258457	0.0204703	0.0357962	0.767452	0.500616
PRAD	MAP1LC3C	0.179418	0.568293	0.610923	0.830663	1	0.314424	0.0205898	0.411394	0.184964	1	1	0.112669	0.324523	0.217582	0.97597	0.0225372	0.623366	0.260162	0.031806	1	1	1
READ	MAP1LC3C	0.912474	0.312742	0.615734	0.0328397	1	0.00850957	0.863457	0.163655	0.668523	1	0.500007	0.379087	0.699511	0.00298795	0.000139834	0.0405319	0.0743541	0.313957	0.683754	0.949885	0.0263731	0.312815
SARC	MAP1LC3C	0.0614578	1	0.184106	0.0622075	1	0.155523	0.0347038	0.722034	0.400264	0.0550032	1	0.408812	0.0287029	0.0796719	0.0593695	0.000340312	0.0372097	0.984475	0.158855	1	1	1
SKCM	MAP1LC3C	1.10403e-08	0.327403	0.776154	0.114023	1	0.000714544	0.947183	0.0181804	0.581032	0.996153	0.653354	0.0179769	0.570048	0.0469971	0.129047	0.00104606	0.00994038	0.994792	0.222502	0.241248	1	0.00617717
STAD	MAP1LC3C	7.9991e-05	0.138202	0.0179802	0.000159059	1	0.00314425	0.852018	0.39006	0.43602	1	0.0831874	0.0506643	0.000710613	3.6803e-12	0.123051	0.221324	0.0050128	0.427757	5.57314e-08	0.0342954	0.0743228	0.000136268
TGCT	MAP1LC3C	2.39258e-15	0.00423705	2.87636e-08	0.00615587	1	0.103859	1.58495e-06	0.979253	0.0124456	1	1	0.452568	0.334896	0.116069	0.902306	1.38901e-19	0.984037	9.15012e-05	0.0800946	1	1	1
THCA	MAP1LC3C	0.0192671	0.625611	0.0704539	0.0195687	1	0.0502597	0.0116728	0.00165713	0.726179	0.316661	0.816728	0.00641338	0.0161545	7.95145e-06	1.2331e-05	6.68855e-07	0.131338	0.342073	8.87911e-05	1	1	1
THYM	MAP1LC3C	0.454255	0.973887	0.714397	0.476024	0.0953769	0.378943	0.368679	0.868706	0.379635	0.242149	0.0826188	0.113642	0.178066	0.548865	0.000902864	0.0289155	0.30992	0.0957972	0.767789	1	1	1
UCEC	MAP1LC3C	0.8549	0.0404329	0.0994558	0.00550287	1	0.218928	0.276705	0.142944	2.37208e-05	0.430942	0.256465	0.803896	0.491082	0.595902	0.000178605	0.205842	0.131536	8.03474e-05	0.97173	0.365882	1	0.950755
UCS	MAP1LC3C	0.770265	0.319801	0.833985	0.668161	1	0.650691	0.153926	0.551697	0.947754	0.0441464	0.599669	0.369556	0.337042	0.157354	0.131705	0.311391	0.285262	0.389714	0.212467	0.155952	0.81368	1
UVM	MAP1LC3C	0.0696422	1	0.290869	0.0256076	1	0.68271	0.141681	0.314604	0.267009	0.476135	0.993591	0.672969	0.154824	0.827049	0.57313	0.108114	0.524298	1	0.0164826	1	1	1
