# Supplementary material for: Immunotherapeutic Value of MAP1LC3C and Its Candidate FDA-Approved Drugs Identified by Pan-Cancer Analysis, Virtual Screening and Sensitivity Analysis
Source: Frontiers journal article supplement (doi:10.3389/fphar.2022.863856), 2022-03-02
Supplement: Data_Sheet_1.ZIP [file Table S4. Correlation analysis between MAP1LC3C expression and ESTIMATE scores.xlsx]

## Sheet: Sheet1
Cancer	P-value
	StromalScore	ImmuneScore
ACC	0.163489	0.662187
BLCA	9.01e-40	2.01e-31
BRCA	1.22e-86	3.17e-45
CESC	1.14e-10	4.41e-06
CHOL	7.7e-05	0.00021291
COAD	1.73e-18	8.24e-15
DLBC	0.614159	0.00248544
ESCA	1.81e-10	5.87e-14
GBM	0.00541297	0.0165006
HNSC	4.6e-37	2.91e-28
KICH	0.432486	0.637006
KIRC	0.717257	0.135075
KIRP	0.00351029	0.00090808
LAML	0.00438422	0.623744
LGG	1.27e-15	0.00016493
LIHC	1.39e-37	6.94e-11
LUAD	0	0
LUSC	1.01e-49	4.33e-55
MESO	0.546608	0.703104
OV	0.002846	0.445591
PAAD	3.98e-24	1.18e-33
PCPG	4.18e-14	1.75e-05
PRAD	8.23e-15	4.38e-09
READ	1.42e-09	9.6e-13
SARC	1.5e-06	0.266875
SKCM	1.98e-09	3.17e-07
STAD	1.01e-23	4.28e-22
TGCT	4.73e-10	5.64e-07
THCA	0.00487989	0.0810488
THYM	1.85e-08	0.143139
UCEC	0.101599	0.00900583
UCS	0.00026238	0.254656
UVM	0.443001	0.119815
