# Supplementary material for: Immunotherapeutic Value of MAP1LC3C and Its Candidate FDA-Approved Drugs Identified by Pan-Cancer Analysis, Virtual Screening and Sensitivity Analysis
Source: Frontiers journal article supplement (doi:10.3389/fphar.2022.863856), 2022-03-02
Supplement: Data_Sheet_1.ZIP [file Table S5. Correlation analysis of MAP1LC3C expression with tumour mutation burden (TMB) and microsatellite instability (MSI).xlsx]

## Sheet: Sheet1
Cancer	TMB		MSI
	Correlation	P-value	Correlation	P-value
ACC	-0.134849	0.236064	0.319745	0.00407267
BLCA	-0.0047121	0.924404	0.00431913	0.930692
BRCA	-0.228317	5.52e-13	0.0440348	0.157688
CESC	-0.206527	0.00043914	-0.0887377	0.123868
CHOL	-0.254042	0.134886	-0.230903	0.175444
COAD	-0.0494539	0.326292	0.101756	0.0355543
DLBC	-0.592852	0.00011042	-0.285365	0.0492932
ESCA	-0.149422	0.0593172	-0.190141	0.0160286
GBM	-0.0180102	0.828003	-0.0512669	0.53187
HNSC	-0.191007	2e-05	-0.206319	3.6e-06
KICH	0.161531	0.198619	-0.0983734	0.435617
KIRC	0.105709	0.0543248	-0.0040721	0.940809
KIRP	0.0994668	0.0979087	-0.0562389	0.34415
LAML	0.135566	0.289428	-0.0614672	0.618522
LGG	0.322675	1.33e-13	-0.0302994	0.495626
LIHC	-0.311978	1.52e-09	-0.11003	0.0346134
LUAD	-0.160597	0.00029878	-0.136062	0.0020524
LUSC	-0.113437	0.0121561	-0.32742	8.78e-14
MESO	-0.0960811	0.399605	0.294341	0.00727049
OV	0.048704	0.423698	0.0342361	0.573979
PAAD	-0.304104	0.00014697	-0.0915063	0.228447
PCPG	-0.110872	0.141794	0.0306386	0.684753
PRAD	0.0409483	0.369697	0.0563678	0.210596
READ	-0.0537042	0.540811	0.00710643	0.930758
SARC	0.0988227	0.130904	0.0379447	0.547989
SKCM	-0.176316	0.00013248	-0.0572543	0.216346
STAD	-0.31785	4.4e-10	-0.289413	1.19e-08
TGCT	0.115763	0.165572	0.253457	0.00175109
THCA	-0.0138077	0.76237	-0.0554005	0.220423
THYM	0.177336	0.0557761	-0.0162489	0.861362
UCEC	-0.0612392	0.161173	0.0523649	0.225282
UCS	-0.139611	0.304784	-0.0474384	0.728452
UVM	-0.0223473	0.844016	-0.20977	0.0618252
