# Supplementary material for: Immunotherapeutic Value of MAP1LC3C and Its Candidate FDA-Approved Drugs Identified by Pan-Cancer Analysis, Virtual Screening and Sensitivity Analysis
Source: Frontiers journal article supplement (doi:10.3389/fphar.2022.863856), 2022-03-02
Supplement: Data_Sheet_1.ZIP [file Table S7. All drug IDs with drug names.xlsx]

## Sheet: Sheet1
ID	Name	CAS
TWS0414	Cannabidiol	13956-29-1
TWP2911	Thymidine	50-89-5
TWO2759	Thymine	65-71-4
TQ0319	Ripasudil hydrochloride dihydrate	887375-67-9
TQ0277	Pralsetinib	2097132-94-8
TQ0237	Lemborexant	1369764-02-2
TQ0210	Savolitinib	1313725-88-0
TQ0203	Tafluprost	209860-87-7
TQ0200	Paricalcitol	131918-61-1
TQ0197	Acenocoumarol	152-72-7
TQ0165	Arglabin	84692-91-1
TQ0152	Dalfopristin	112362-50-2
TQ0107	Pemafibrate	848259-27-8
TQ0095	Brincidofovir	444805-28-1
TQ0084	Lumateperone Tosylate	1187020-80-9
TN2264	Terpinine-4-ol	562-74-3
TMA2394	DL-α-Tocopherol	10191-41-0
TJS2190	Nordihydroguaiaretic acid	500-38-9
TJS0314	4-Methyllimetol	2107-76-8
TJO2758	D-Glucuronic acid	6556-12-3
TJO2729	alanine	56-41-7
TJO2691	L-(-)-Fucose	2438-80-4
TCS0102	Pulegone	89-82-7
TCP2830	Neryl acetate	141-12-8
TC0025	Testosterone acetate	1045-69-8
T9124	Laninamivir octanoate	203120-46-1
T9115	Vanillic Acid	121-34-6
T9114	β-Caryophyllene	87-44-5
T9047	Fluprednisolone	53-34-9
T8907	Minaprine dihydrochloride	25953-17-7
T8899	Metipranolol	22664-55-7
T8835	Tosufloxacin hydrochloride	104051-69-6
T8802	Trypsin inhibitor (human urine urinastatin protein moiety)	80499-32-7
T8787	Drotaverine hydrochloride	985-12-6
T8777	BecloMethasone	4419-39-0
T8734	Choline	123-41-1
T8709	Nandrolone phenpropionate	62-90-8
T8690	Brexpiprazole HCl	913612-38-1
T8689	CHLOROQUINE	54-05-7
T8684	AMG-510	2296729-00-3
T8654	Plx-4032	1029872-54-5
T8651	CAL-101	1146702-54-6
T8634	Bromotheophylline	10381-75-6
T8599	Betazole hydrochloride	138-92-1
T8581	Flecainide hydrochloride	57415-44-8
T8577	Hydroxyamphetamine	103-86-6
T8526	Metformin	657-24-9
T8516	Levomenol	23089-26-1
T8482	Ripretinib	1442472-39-0
T8462	Enoximone	77671-31-9
T8452	Dantrolene	7261-97-4
T8416	Capmatinib xHCl	1029714-89-3
T8413	Lasmiditan succinate	439239-92-6
T8406	Gadobutrol	770691-21-9
T8405	Vardenafil hydrochloride	224785-91-5
T8404	Kasugamycin hydrochloride hydrate	200132-83-8
T8403	Cinacalcet	226256-56-0
T8402	Regorafenib Hydrochloride	835621-07-3
T8401	Efonidipine hydrochloride monoethanolate	111011-76-8
T8400	Pamidronic acid	40391-99-9
T8399	Crizotinib hydrochloride	1415560-69-8
T8398	Lasmiditan hydrochloride	613677-28-4
T8397	Ixazomib citrate	1239908-20-3
T8396	Prednisone acetate	125-10-0
T8395	Nomegestrol acetate	58652-20-3
T8394	(R)-Serine	312-84-5
T8393	UTP, Trisodium Salt	19817-92-6
T8392	L(+)-Asparagine monohydrate	5794-13-8
T8391	Cesium chloride	7647-17-8
T8389	Trifluoperazine	117-89-5
T8388	Vonoprazan	881681-00-1
T8387	Alectinib hydrochloride	1256589-74-8
T8386	Esomeprazole Magnesium trihydrate	217087-09-7
T8385	Metoclopramide hydrochloride hydrate	54143-57-6
T8384	Gatifloxacin hydrochloride	121577-32-0
T8383	Cyclopentolate Hydrochloride	5870-29-1
T8382	Cariprazine HCl	1083076-69-0
T8380	Bendamustine	16506-27-7
T8365	Methenamine Hippurate	5714-73-8
T8364	Mebrofenin	78266-06-5
T8363	DL-Serine	302-84-1
T8362	Benzamidine HCl	1670-14-0
T8361	Tetraethylammonium bromide	71-91-0
T8360	(-)-β-Pinene	18172-67-3
T8358	Fenoterol	13392-18-2
T8349	Cyclofenil	2624-43-3
T8347	Rifamycin S	13553-79-2
T8301	Amaranth	915-67-3
T8270	Deserpidine	131-01-1
T8239	Cromoglicic acid	16110-51-3
T8222	Selpercatinib	2152628-33-4
T8183	Deslanoside	17598-65-1
T8173	Delafloxacin meglumine	352458-37-8
T8149	Dobutamine (hydrochloride)	49745-95-1
T8148	Mupirocin calcium	115074-43-6
T8146	Imidocarb dipropionate	55750-06-6
T8145	Benzyl cinnamate	103-41-3
T8143	Bevantolol hydrochloride	42864-78-8
T8141	L-Cysteine HCl	52-89-1
T8139	Sulfamethoxazole sodium	4563-84-2
T8138	Phenazine methosulfate	299-11-6
T8136	Perospirone hydrochloride	129273-38-7
T8135	Minoxidil sulphate	83701-22-8
T8134	Cefathiamidine	33075-00-2
T8133	SulfadiMethoxine sodium	1037-50-9
T8132	Iron sucrose	8047-67-4
T8131	Lithium carbonate	554-13-2
T8130	Ciprofloxacin hydrochloride hydrate	86393-32-0
T8129	Potassium acetate	127-08-2
T8128	Mosapride	112885-41-3
T8127	Disodium Phosphate	7558-79-4
T8126	Cefodizime Sodium	86329-79-5
T8125	Quinidine sulfate	6591-63-5
T8124	Sodium benzoate	532-32-1
T8123	Diazolidinyl urea	78491-02-8
T8122	Mafenide Acetate	13009-99-9
T8118	Bekanamycin	4696-76-8
T8083	Pyridoxal 5-phosphate monohydrate	41468-25-1
T8080	2-Methylhexanoic acid	4536-23-6
T8073	Sodium succinate	150-90-3
T8071	L-Lysine hydrochloride	657-27-2
T8070	Nonadecanoic acid	646-30-0
T8069	Triethyl citrate	77-93-0
T8068	o-Toluic acid	118-90-1
T8066	Sulbenicillin Sodium	28002-18-8
T8065	Tiamulin	55297-95-5
T8064	Lactobionic acid	96-82-2
T8063	Cephapirin Benzathine	97468-37-6
T8062	Cefazedone	56187-47-4
T8061	Citronellal	106-23-0
T8057	Citronellyl acetate	150-84-5
T8049	Pentadecanoic acid	1002-84-2
T8048	Diphenylamine Hydrochloride	537-67-7
T8047	(1R)-(-)-Menthyl acetate	2623-23-6
T8046	Tosufloxacin p-Toluenesulfonate Hydrate	1400591-39-0
T8039	Brucine sulfate heptahydrate	60583-39-3
T8033	Sodium Thiocyanate	540-72-7
T8031	Terephthalic acid	100-21-0
T8026	(S)-(−)-Limonene	5989-54-8
T8025	Phenylglyoxylic acid	611-73-4
T8019	Sorbic acid	110-44-1
T8010	Dibutyl sebacate	109-43-3
T8003	Methotrexate disodium	7413-34-5
T7975	Rhodamine B	81-88-9
T7974	Lynestrenol	52-76-6
T7969	Dipyrithione	3696-28-4
T7964	Palatinitol	64519-82-0
T7952	Noscapine	128-62-1
T7943	Fluphenazine decanoate	5002-47-1
T7941	Imipramine (hydrochloride)	113-52-0
T7940	Milnacipran ((1S-cis) hydrochloride)	175131-60-9
T7939	Fingolimod	162359-55-9
T7938	Quinidine	56-54-2
T7910	Anisic aldehyde	123-11-5
T7908	DL-Methionine Methylsulfonium Chloride	3493-12-7
T7903	Saquinavir	127779-20-8
T7902	Ozenoxacin	245765-41-7
T7894	AGN-190299	118292-41-4
T7853	Pachycarpine	492-08-0
T7839	Lasofoxifene Tartrate	190791-29-8
T7824	Eberconazole Nitrate	130104-32-4
T7812	Acitazanolast	114607-46-4
T7811	Pilsicainide HCl	88069-49-2
T7808	Alacepril	74258-86-9
T7807	Bendazac	20187-55-7
T7804	Garenoxacin mesylate hydrate	223652-90-2
T7779	Nelfinavir	159989-64-7
T7766	Remdesivir	1809249-37-3
T7744	Piperaquine tetraphosphate tetrahydrate	915967-82-7
T7733	Cefotaxime	63527-52-6
T7714	Temocapil	111902-57-9
T7654	L-DOPA methyl ester (hydrochloride)	1421-65-4
T7651	Rose Bengal	632-69-9
T7650	Resazurin sodium salt	62758-13-8
T7636	Phenprocoumon	435-97-2
T7604	Valrubicin	56124-62-0
T7603	Pinaverium bromide	53251-94-8
T7593	Levomefolate calcium	151533-22-1
T7588	Lefamulin	1061337-51-6
T7587	Tenapanor	1234423-95-0
T7584	zanubrutinib	1691249-45-2
T7583	solriamfetol	178429-62-4
T7582	tafamidis meglumine	951395-08-7
T7581	voxelotor	1446321-46-5
T7569	Clebopride malate	57645-91-7
T7560	Pivmecillinam hydrochloride	32887-03-9
T7556	Fadrozole hydrochloride	102676-31-3
T7555	Piperidolate hydrochloride	129-77-1
T7551	Belotecan hydrochloride	213819-48-8
T7537	Norgestimate	35189-28-7
T7533	Taurolidine	19388-87-5
T7531	Pirmenol	68252-19-7
T7503	Upadacitinib	1310726-60-3
T7477	Antazoline	91-75-8
T7469	Alendronic Acid	66376-36-1
T7468	α-Terpineol	10482-56-1
T7465	4-Methylbenzylidene camphor	36861-47-9
T7459	Abametapir	1762-34-1
T7449	1, 10-Phenanthroline monohydrate	5144-89-8
T7446	Acetophenone	98-86-2
T7445	Acetamide	60-35-5
T7423	Diquafosol tetrasodium	211427-08-6
T7421	Melperone	3575-80-2
T7417	Avatrombopag	570406-98-3
T7412	Tandospirone citrate	112457-95-1
T7392	Revefenacin	864750-70-9
T7387	Ceftaroline fosamil	400827-46-5
T7386	Bretylium tosylate	61-75-6
T7363	Ibuprofen Piconol	64622-45-3
T7333	Pyrvinium pamoate	3546-41-6
T7313	Enclomiphene citrate	7599-79-3
T7282	Tenofovir alafenamide fumarate	1392275-56-7
T7225	AnaMorelin hydrochloride	861998-00-7
T7223	Gestrinone	16320-04-0
T7219	Flecainide (acetate)	54143-56-5
T7216	Mirogabalin	1138245-13-2
T7213	Demecarium bromide	56-94-0
T7212	Delavirdine (mesylate)	147221-93-0
T7197	Fadrozole	102676-47-1
T7176	Pitolisant hydrochloride	903576-44-3
T7175	AST2818 mesylate	2130958-55-1
T7164	Levalbuterol tartrate	661464-94-4
T7160	Lofexidine	31036-80-3
T7158	Ombitasvir	1258226-87-7
T7148	JOSAMYCIN	16846-24-5
T7147	Valbenazine	1025504-45-3
T7146	Piperazine adipate	142-88-1
T7133	Anagliptin	739366-20-2
T7126	Hydroquinine	522-66-7
T7120	Cefetamet pivoxil hydrochloride	111696-23-2
T7117	Sapropterin Hydrochloride	69056-38-8
T7116	Sodium gualenate	6223-35-4
T7111	Tenofovir Disoproxil	201341-05-1
T7106	Menaquinone-4	863-61-6
T7094	Levomefolic Acid	31690-09-2
T7093	Rafoxanide	22662-39-1
T7085	Mebhydroline	524-81-2
T7068	Eicosapentaenoic acid ethyl ester	86227-47-6
T7066	Fosphenytoin sodium	92134-98-0
T7064	Valproic Acid	99-66-1
T7060	1-Adamantylamine	768-94-5
T7056	Dronedarone	141626-36-0
T7049	Herniarin	531-59-9
T7044	Norepinephrine	51-41-2
T7043	Cefotetan	69712-56-7
T7041	Donepezil	120014-06-4
T7013	Vorapaxar	618385-01-6
T7004	Tubercidin	69-33-0
T7000	Tiagabine hydrochloride	145821-59-6
T6S2023	Harpagoside	19210-12-9
T6S1966	Curculigoside	85643-19-2
T6S1665	Irisflorentin	41743-73-1
T6S1529	1,5-Dicaffeoylquinic acid	30964-13-7
T6S1373	Vitexicarpin	479-91-4
T6S1369	Vitexin	3681-93-4
T6S1256	Ruscogenin	472-11-7
T6S1141	Ganoderic acid A	81907-62-2
T6S0722	Isoorientin	4261-42-1
T6S0659	Rhynchophylline	76-66-4
T6S0525	Farrerol	24211-30-1
T6S0232	Eriodictyol	552-58-9
T6S0107	Peimine	23496-41-5
T6999	Teneligliptin hydrobromide	906093-29-6
T6998	Tedizolid Phosphate	856867-55-5
T6992	Sodium sulfadiazine	547-32-0
T6991	Sodium Nitroprusside Dihydrate	13755-38-9
T6986	Sivelestat	127373-66-4
T6978	Almitrine dimesylate	29608-49-9
T6968	Riociguat	625115-55-1
T6964	Resiquimod	144875-48-9
T6963	Reboxetine mesylate	98769-84-7
T6962	Rasagiline Mesylate	161735-79-1
T6955	Propafenone HCl	34183-22-7
T6953	Prilocaine	721-50-6
T6952	Prasugrel Hydrochloride	389574-19-0
T6951	Pramipexole 2HCl Monohydrate	191217-81-9
T6946	Pimavanserin tartrate	706782-28-7
T6943	Picropodophyllin	477-47-4
T6930	Pazopanib HCl	635702-64-6
T6929	Pantoprazole sodium	138786-67-1
T6923	Ozanimod	1306760-87-1
T6918	Olmutinib	1353550-13-6
T6917	Oleuropein	32619-42-4
T6915	Darolutamide	1297538-32-9
T6914	Oclacitinib maleate	1640292-55-2
T6906	Tamoxifen	10540-29-1
T6905	Netupitant	290297-26-6
T6897	Monomethyl auristatin E	474645-27-7
T6892	Niraparib tosylate	1038915-73-9
T6888	Methylene Blue	61-73-4
T6880	Larotrectinib sulfate	1223405-08-0
T6875	Lesinurad	878672-00-5
T6874	Lercanidipine hydrochloride	132866-11-6
T6873	Lauric Acid	143-07-7
T6871	L-Glutamic acid monosodium salt	142-47-2
T6864	Ixabepilone	219989-84-1
T6862	Isatin	91-56-5
T6841	Fumagillin	23110-15-8
T6835	Fenoldopam mesylate	67227-57-0
T6833	Favipiravir	259793-96-9
T6831	Etretinate	54350-48-0
T6825	Eltrombopag Olamine	496775-62-3
T6819	Desogestrel	54024-22-5
T6814	Cyproheptadine HCl	969-33-5
T6796	CB5083	1542705-92-9
T6788	Bitopertin	845614-11-1
T6781	Benzenesulfonamide	98-10-2
T6765	Atipamezole hydrochloride	104075-48-1
T6758	Anisomycin	22862-76-6
T6752	Ademetionine disulfate tosylate	97540-22-2
T6751	Acetylcholine iodide	2260-50-6
T6744	Methylbenactyzine Bromide	3166-62-9
T6742	2-Deoxy-D-glucose	154-17-6
T6739	Zoledronic Acid	118072-93-8
T6737	Zaltoprofen	74711-43-6
T6736	Zafirlukast	107753-78-6
T6723	Voglibose	83480-29-9
T6717	Vanillin	121-33-5
T6716	Valsartan	137862-53-4
T6715	Valnemulin HCl	133868-46-9
T6713	Ulipristal	159811-51-5
T6710	Troxipide	30751-05-4
T6708	Tolcapone	134308-13-7
T6703	Tetrahydrozoline HCl	522-48-5
T6702	Terbinafine	91161-71-6
T6698	Temocapril HCl	110221-44-8
T6696	Tazarotene	118292-40-3
T6694	Tamibarotene	94497-51-5
T6688	Synephrine HCl	5985-28-4
T6687	Suprofen	40828-46-4
T6686	Sulconazole Nitrate	61318-91-0
T6684	Succinylcholine Chloride Dihydrate	6101-15-1
T6680	Staurosporine	62996-74-1
T6676	Sofosbuvir	1190307-88-0
T6675	Sodium Picosulfate	10040-45-6
T6674	Sodium ascorbate	134-03-2
T6670	Silymarin	65666-07-1
T6665	Sertaconazole nitrate	99592-39-9
T6653	Salmeterol Xinafoate	94749-08-3
T6652	Salbutamol Sulfate	51022-70-9
T6651	Safinamide mesylate	202825-46-5
T6649	S- (+)-Rolipram	85416-73-5
T6648	Rotundine	483-14-7
T6647	Rotigotine	99755-59-6
T6646	Rosiglitazone HCl	302543-62-0
T6645	Ropivacaine HCl monohydrate	132112-35-7
T6644	Rolipram	61413-54-5
T6641	Rilmenidine Phosphate	85409-38-7
T6638	Retapamulin	224452-66-8
T6633	Ranolazine	95635-55-5
T6632	Raltitrexed	112887-68-0
T6631	Quinine HCl Dihydrate	6119-47-7
T6630	Quercetin Dihydrate	6151-25-3
T6628	Pirarubicin	72496-41-4
T6625	Ozagrel hydrochloride	78712-43-3
T6624	Oxytetracycline Dihydrate	6153-64-6
T6618	Orphenadrine Citrate	4682-36-4
T6616	Ondansetron HCl	99614-01-4
T6606	Nicaraven	79455-30-4
T6603	Nelarabine	121032-29-9
T6602	Naratriptan hydrochloride	143388-64-1
T6598	MPEP	96206-92-7
T6597	Mosapride Citrate	112885-42-4
T6595	Moexipril HCl	82586-52-5
T6588	Mitoxantrone	65271-80-9
T6582	Mezlocillin Sodium	42057-22-7
T6580	Meprednisone	1247-42-3
T6579	Medetomidine HCl	86347-15-1
T6577	Manidipine	89226-50-6
T6576	Malotilate	59937-28-9
T6574	Lumiracoxib	220991-20-8
T6572	Lorcaserin HCl	846589-98-8
T6571	Lomerizine hydrochloride	101477-54-7
T6567	Levofloxacin	100986-85-4
T6566	Levobupivacaine HCl	27262-48-2
T6565	Levobetaxolol HCl	116209-55-3
T6561	Laquinimod	248281-84-7
T6560	Lappaconite HBr	97792-45-5
T6552	Istradefylline	155270-99-8
T6550	Isoconazole nitrate	24168-96-5
T6549	Isepamicin sulfate	67814-76-0
T6548	Irsogladine	57381-26-7
T6547	Ipratropium Bromide	22254-24-6
T6543	Indoximod	110117-83-4
T6542	Imidapril HCl	89396-94-1
T6541	Ibutilide Fumarate	122647-32-9
T6540	Ibuprofen Lysine	57469-77-9
T6538	Hydroxypropyl Cellulose	9004-64-2
T6535	Histamine Phosphate	51-74-1
T6534	Histamine 2HCl	56-92-8
T6533	Hexestrol	84-16-2
T6529	Halobetasol Propionate	66852-54-8
T6523	Guanosine	118-00-3
T6522	Guanabenz Acetate	23256-50-0
T6519	Gramine	87-52-5
T6518	Gossypol	303-45-7
T6514	Glasdegib	1095173-27-5
T6512	Geneticin sulfate	108321-42-2
T6507	Gabapentin HCl	60142-95-2
T6505	Formoterol Hemifumarate	43229-80-7
T6504	Flupirtine maleate	75507-68-5
T6503	Fluorometholone Acetate	3801-06-7
T6502	Fluocinonide	356-12-7
T6501	Fludarabine Phosphate	75607-67-9
T6499	Fenticonazole Nitrate	73151-29-8
T6497	Fenoprofen Calcium	34597-40-5
T6493	Escitalopram Oxalate	219861-08-2
T6491	Equol	531-95-3
T6488	Epinastine HCl	108929-04-0
T6487	Encorafenib	1269440-17-6
T6486	Enalapril Maleate	76095-16-4
T6485	Embelin	550-24-3
T6482	Efaproxiral Sodium	170787-99-2
T6478	Donepezil HCl	120011-70-3
T6476	Dofetilide	115256-11-6
T6475	DL-Carnitine HCl	461-05-2
T6474	Divalproex Sodium	76584-70-8
T6473	Dioscin	19057-60-4
T6472	Difluprednate	23674-86-4
T6470	Diclofenac Potassium	15307-81-0
T6469	Dichlorphenamide	120-97-8
T6467	Dexrazoxane HCl	149003-01-0
T6466	Dexmedetomidine HCl	145108-58-3
T6465	Dexamethasone Sodium Phosphate	55203-24-2
T6464	Detomidine HCl	90038-01-0
T6461	Dapoxetine HCl	129938-20-1
T6460	Cysteamine HCl	156-57-0
T6453	Conivaptan hydrochloride	168626-94-6
T6452	Closantel Sodium	61438-64-0
T6450	Clinofibrate	30299-08-2
T6448	Clindamycin HCl	21462-39-5
T6447	Clindamycin	18323-44-9
T6446	Clevudine	163252-36-6
T6443	Chloroprocaine HCl	3858-89-7
T6439	Cetylpyridinium Chloride	123-03-5
T6438	Cefoselis Sulfate	122841-12-7
T6437	Cefoperazone	62893-19-0
T6436	Cefaclor	53994-73-3
T6431	Calcium Levofolinate	80433-71-2
T6430	Calcifediol	19356-17-3
T6422	Brimonidine Tartrate	70359-46-5
T6414	Bisacodyl	603-50-9
T6411	Biapenem	120410-24-4
T6410	Bexarotene	153559-49-0
T6406	Besifloxacin HCl	405165-61-9
T6405	Bepotastine Besilate	190786-44-8
T6403	Siponimod	1230487-00-9
T6401	Azithromycin	83905-01-5
T6398	Azaperone	1649-18-9
T6397	Atracurium besylate	64228-81-5
T6390	Anagrelide HCl	58579-51-4
T6388	Amprenavir	161814-49-9
T6387	Ampiroxicam	99464-64-9
T6386	Ampicillin sodium	69-52-3
T6384	Ammonium Glycyrrhizinate	1407-03-0
T6381	Amifostine trihydrate	112901-68-5
T6375	Alibendol	26750-81-2
T6374	Alfacalcidol	41294-56-8
T6373	Alendronate sodium hydrate	121268-17-5
T6372	Albendazole Oxide	54029-12-8
T6369	Adenine sulfate	321-30-2
T6368	Abscisic Acid	21293-29-8
T6367	Abacavir sulfate	188062-50-2
T6359	1-Hexadecanol	36653-82-4
T6357	(S)-crizotinib	1374356-45-2
T6355	(R)-baclofen	69308-37-8
T6349	Sitafloxacin Hydrate	163253-35-8
T6345	KX2-391	897016-82-9
T6340	Enalaprilat Dihydrate	84680-54-6
T6336	Amonafide	69408-81-7
T6334	Ridaforolimus	572924-54-0
T6326	BMS345541	445430-58-0
T6321	Tofacitinib	477600-75-2
T6316	Calcitriol	32222-06-3
T6307	Lubiprostone	136790-76-6
T6302	Lonafarnib	193275-84-2
T6301	Tosedostat	238750-77-1
T6293	Mycophenolate Mofetil	128794-94-5
T6288	Mozavaptan	137975-06-5
T6280	Enzastaurin	170364-57-5
T6272	Fosbretabulin Disodium	168555-66-6
T6268	Ceftiofur hydrochloride	103980-44-5
T6267	Lomitapide	182431-12-5
T6264	Bosentan	147536-97-8
T6253	Talazoparib	1207456-01-6
T6246	Cobicistat	1004316-88-4
T6244	Cidofovir	113852-37-2
T6242	Rupatadine Fumarate	182349-12-8
T6241	Quetiapine Fumarate	111974-72-2
T6240	Palbociclib Isethionate	827022-33-3
T6239	Palbociclib hydrochloride	827022-32-2
T6237	Trelagliptin	865759-25-7
T6236	Ozagrel	82571-53-7
T6235	Lapatinib Ditosylate	388082-77-7
T6234	Ambroxol hydrochloride	23828-92-4
T6233	Entinostat	209783-80-2
T6232	Vilazodone HCl	163521-08-2
T6231	Tebipenem Pivoxil	161715-24-8
T6230	Imatinib	152459-95-5
T6229	Daclatasvir	1009119-64-5
T6228	Irinotecan	97682-44-5
T6227	Benidipine hydrochloride	91599-74-5
T6226	Pemetrexed Disodium Hydrate	357166-30-4
T6221	Nalmefene hydrochloride	58895-64-0
T6219	Azilsartan Medoxomil	863031-21-4
T6218	Selumetinib	606143-52-6
T6216	Abiraterone	154229-19-3
T6215	Abiraterone Acetate	154229-18-2
T6214	Emtricitabine	143491-57-0
T6213	Vinorelbine Tartrate	125317-39-7
T6212	Combretastatin A4	117048-59-6
T6211	Posaconazole	171228-49-2
T6199	Ribociclib	1211441-98-3
T6198	Dolutegravir	1051375-16-6
T6195	Baloxavir marboxil	1985606-14-1
T6194	Fidaxomicin	873857-62-6
T6190	Telaprevir	402957-28-2
T6188	Desvenlafaxine succinate hydrate	386750-22-7
T6179	Latamoxef sodium	64953-12-4
T6169	Indirubin	479-41-4
T6165	Bardoxolone Methyl	218600-53-4
T6127	Rucaparib Phosphate	459868-92-9
T6121	Tepotinib	1100598-32-0
T6120	Pralatrexate	146464-95-1
T6115	Fostamatinib	901119-35-5
T6112	Doxercalciferol	54573-75-0
T6101	Entospletinib	1229208-44-9
T6098	Cabotegravir	1051375-10-0
T6096	Pretomanid	187235-37-6
T6089	Neflamapimod	209410-46-8
T6088	Anidulafungin	166663-25-8
T6069	Gemcitabine HCl	122111-03-9
T6044	Telotristat Etiprate	1137608-69-5
T6035	Odanacatib	603139-19-1
T6033	Zotarolimus	221877-54-9
T6025	Danoprevir	850876-88-9
T6020	Pacritinib	937272-79-2
T6019	Volasertib	755038-65-4
T6018	Zosuquidar 3HCl	167465-36-3
T6016	Maraviroc	376348-65-1
T6010	Idarubicin HCl	57852-57-0
T6006	Romidepsin	128517-07-7
T6002	Enzalutamide	915087-33-1
T6001	Nelfinavir Mesylate	159989-65-8
T5S2360	Corydaline	518-69-4
T5S2178	Fargesin	31008-19-2
T5S1569	AKBA	67416-61-9
T5S1058	Triptonide	38647-11-9
T5S0814	Berberine hydrogen sulphate	633-66-9
T5S0802	Palmatine	3486-67-7
T5S0754	Isoquercitrin	482-35-9
T5S0662	Gelsemine	509-15-9
T5S0636	Citric acid	77-92-9
T5S0045	Isofraxidin	486-21-5
T5995	Larotrectinib	1223403-58-4
T5985	Glycolic acid	79-14-1
T5984	Indole-3-carboxylic acid	771-50-6
T5983	o-Phenanthroline	66-71-7
T5967	Ethacridine lactate	1837-57-6
T5964	Olmesartan	144689-24-7
T5963	Menadione sodium bisulfite	130-37-0
T5954	Alpha-Methyldopa Sesquihydrate	41372-08-1
T5940	Proxyphylline	603-00-9
T5939	Calcium dobesilate	20123-80-2
T5913	Sulbutiamine	3286-46-2
T5889	Kojic acid	501-30-4
T5886	Benzenebutyric acid	1821-12-1
T5882	3-Bromopyruvic acid	1113-59-3
T5863	Indinavir sulfate	157810-81-6
T5858	Sertindole	106516-24-9
T5857	Trametinib DMSO solvate	1187431-43-1
T5856	Barnidipine hydrochloride	104757-53-1
T5855	Edrophonium chloride	116-38-1
T5842	Bromocriptine mesylate	22260-51-1
T5841	Travoprost	157283-68-6
T5836	Eprinomectin	123997-26-2
T5832	Besifovir	441785-25-7
T5820	Amsacrine hydrochloride	54301-15-4
T5804	Pneumocandin B0	135575-42-7
T5720	Boldine	476-70-0
T5675	HS-10296 hydrochloride	2134096-03-8
T5666	Dipotassium glycyrrhizinate	68797-35-3
T5665	Geraniol	106-24-1
T5653	Cinnamyl acetate	103-54-8
T5623	Bisphenol A	80-05-7
T5613	Squalane	111-01-3
T5607	Geranyl acetate	105-87-3
T5603	Phthalic acid	88-99-3
T5602	Benzylpenicillin potassium	113-98-4
T5584	Sodium phytate hydrate	14306-25-3
T5573	Coenzyme Q9	303-97-9
T5570	Cephalotin acid	153-61-7
T5562	Methyl nicotinate	93-60-7
T5559	Carboxine	5234-68-4
T5557	Propylparaben	94-13-3
T5552	Methyl cinnamate	103-26-4
T5551	Levulinic acid	123-76-2
T5549	Melamine	108-78-1
T5548	(-)-Verbenone	1196-01-6
T5545	Maltol	118-71-8
T5543	TriacetonaMine	826-36-8
T5515	Hemin	16009-13-5
T5495	Decloxizine dihydrochloride	13073-96-6
T5471	GUANABENZ	5051-62-7
T5460	Mofezolac	78967-07-4
T5396	Letermovir	917389-32-3
T5394	Prulifloxacin	123447-62-1
T5391	Bepridil hydrochloride	68099-86-5
T5376	Aranidipine	86780-90-7
T5370	DL-Dithiothreitol	3483-12-3
T5369	Docosahexaenoic Acid	6217-54-5
T5330	Fluralaner	864731-61-3
T5328	Fosfluconazole	194798-83-9
T5327	Amezinium (methylsulfate)	30578-37-1
T5326	Sugammadex (sodium)	343306-79-6
T5325	Nifurtimox	23256-30-6
T5323	MD 69276	29218-27-7
T5309	Dimethylamine hydrochloride	506-59-2
T5300	Ammonium formate	540-69-2
T5293	Maltotriose	1109-28-0
T5292	N-Acetyl-L-tyrosine	537-55-3
T5286	Glycyl-glycine	556-50-3
T5271	5-Methoxytryptamine	608-07-1
T5266	Glycerol Tri-n-octanoate	538-23-8
T5264	Androsterone	53-41-8
T5202	Imidazole	288-32-4
T5189	Omadacycline	389139-89-3
T5186	Oseltamivir acid	187227-45-8
T5174	Nestoron	7759-35-5
T5171	Treprostinil Sodium	289480-64-4
T5164	Cabozantinib hydrochloride (849217-68-1(free base))	T5164
T5159	BI 1744 hydrochloride	869477-96-3
T5153	Apatinib mesylate	1218779-75-9
T5135	Fupentixol Dihydrochloride	2413-38-9
T5134	Vilanterol trifenatate	503070-58-4
T5133	Dabigatran Etexilate Mesylate	872728-81-9
T5127	ABT530	1353900-92-1
T5126	Glecaprevir	1365970-03-1
T5109	Avapritinib	1703793-34-3
T5077	Sodium Desoxycholate	302-95-4
T5067	Flavin Adenine Dinucleotide Disodium	84366-81-4
T5059	L(+)-Tartaric acid	87-69-4
T5058	BGB-290	1446261-44-4
T5051	Isopropamide Iodide	71-81-8
T5050	Selegiline hydrochloride	14611-52-0
T5041	Faropenem sodium	122547-49-3
T5040	Medroxyprogesterone	520-85-4
T5039	Sodium 4-aminohippurate Hydrate	94-16-6
T5038	Cephapirin Sodium	24356-60-3
T5037	Midecamycin	35457-80-8
T5036	cangrelor tetrasodium	163706-36-3
T5035	Methoxyphenamine Hydrochloride	5588-10-3
T5033	Olprinone	106730-54-5
T5032	Iguratimod	123663-49-0
T5031	Elagolix sodium	832720-36-2
T5030	Zofenopril (calcium)	81938-43-4
T5029	Oxaceprol	33996-33-7
T5028	Landiolol hydrochloride	144481-98-1
T5027	Dimemorfan phosphate	36304-84-4
T5024	Cefotiam Hexetil Hydrochloride	95789-30-3
T5023	Propiverine hydrochloride	54556-98-8
T5022	Ceforanide	60925-61-3
T5017	Nimustine Hydrochloride	55661-38-6
T5016	Tofogliflozin hydrate	1201913-82-7
T5014	Prostaglandin E2 (PGE2)	363-24-6
T5013	Brequinar	96187-53-0
T5012	Ethoxzolamide	452-35-7
T5011	Manganese chloride	7773-01-5
T5010	Propyphenazone (4-Isopropylantipyrine)	479-92-5
T5009	Trimethobenzamide hydrochloride	554-92-7
T5008	Teprenone	6809-52-5
T5007	Benproperine phosphate	19428-14-9
T5006	Flucloxacillin sodium	1847-24-1
T5005	Eperisone hydrochloride	56839-43-1
T5003	Rifamycin sodium salt	14897-39-3
T5002	Methyl Aminolevulinate Hydrochloride	79416-27-6
T5001	Nintedanib Ethanesulfonate Salt	656247-18-6
T5000	Diflucortolone valerate	59198-70-8
T4S1990	Carvacrol	499-75-2
T4S1725	Galanthamine	357-70-0
T4S0797	Berberine	2086-83-1
T4S0647	Butylphthalide	6066-49-5
T4999	Ertugliflozin	1210344-57-2
T4997	Umeclidinium bromide	869113-09-7
T4995	Cefpirome sulfate	98753-19-6
T4993	Afloqualone	56287-74-2
T4992	Cefamandole nafate	42540-40-9
T4991	Ertapenem sodium	153773-82-1
T4990	Cefcapene Pivoxil Hydrochloride	147816-24-8
T4989	Fosfomycin Tromethamine	78964-85-9
T4988	Boceprevir	394730-60-0
T4987	Calcium α-D-heptagluconate hydrate	17140-60-2
T4986	Imidafenacin	170105-16-5
T4985	Neticonazole Hydrochloride	130773-02-3
T4983	Isoetharine mesylate salt	7279-75-6
T4982	Benznidazole	22994-85-0
T4981	Anisotropine Methylbromide	80-50-2
T4980	Betrixaban maleate	936539-80-9
T4979	Procyclidine hydrochloride	1508-76-5
T4978	Sarpogrelate hydrochloride	135159-51-2
T4977	Sofalcone	64506-49-6
T4976	TGR1202	1532533-67-7
T4966	Ufenamate	67330-25-0
T4952	10-Hydroxycampothecin	67656-30-8
T4923	7-Dehydrocholesterol	434-16-2
T4913	Maleic acid	110-16-7
T4911	alpha-Arbutin	84380-01-8
T4883	Creatine	57-00-1
T4874	Thiamine pyrophosphate	154-87-0
T4872	Palmitoleic acid	373-49-9
T4868	gamma-Linolenic acid	506-26-3
T4845	L-Lactic acid	79-33-4
T4844	L-Methionine	63-68-3
T4832	Cytosine	71-30-7
T4826	L-Histidine monohydrochloride monohydrat	5934-29-2
T4825	D(+)-Xylose	58-86-6
T4823	D-(-)-Fructose	57-48-7
T4818	2-Deoxy-D-ribose	533-67-5
T4815	Hippuric acid	495-69-2
T4813	L-Citrulline	372-75-8
T4812	D-Mannose	3458-28-4
T4804	Pyruvic acid	127-17-3
T4799	Indole	120-72-9
T4797	Bis(2-ethylhexyl) phthalate	117-81-7
T4786	D-(-)-Ribose	50-69-1
T4776	Glycerol	56-81-5
T4749	Squalene	111-02-4
T4746	Purine	120-73-0
T4733	Sucrose	57-50-1
T4725	N-Acetyl-D-mannosamine	7772-94-3
T4723	D-(-)-Tagatose	87-81-0
T4718	Uridine 5'-monophosphate	58-97-9
T4709	D-Mannosamine hydrochloride	5505-63-5
T4693	2-APB	524-95-8
T4690	Betrixaban hydrochloride(330942-05-7(free base))	T4690
T4686	Simeprevir	923604-59-5
T4683	3'-Deoxy-3'-fluorothymidine	25526-93-6
T4682	Allopregnanolone	516-54-1
T4651	Vadadustat	1000025-07-9
T4616	5-Chloro-2-methoxyprocainamide	364-62-5
T4615	Balsalazide disodium salt dihydrate	150399-21-6
T4610	BMS927711	1289023-67-1
T4602	Hydrocortisone 21-hemisuccinate	2203-97-6
T4590	L-KAWAIN	500-64-1
T4577	Cariprazine	839712-12-8
T4576	Perospirone	150915-41-6
T4575	Chromium picolinate	14639-25-9
T4574	AHU377	149709-62-6
T4573	Cyclothiazide	2259-96-3
T4572	Desoximetasone	382-67-2
T4570	Pipobroman	54-91-1
T4568	Dolasetron	115956-12-2
T4567	Sulfaphenazole	526-08-9
T4566	Lodoxamide	53882-12-5
T4565	Tafamidis	594839-88-0
T4564	Ethacrynic acid	58-54-8
T4563	Thonzylamine	91-85-0
T4562L	Ramosetron hydrochloride	132907-72-3
T4562	Ramosetron	132036-88-5
T4561	Tiaprofenic acid	33005-95-7
T4560	Alprenolol	13655-52-2
T4559	Isocarboxazid	59-63-2
T4558	Trioxsalen	3902-71-4
T4557	Amylmetacresol	1300-94-3
T4553	Procaine penicillin G	54-35-3
T4552	Fursultiamine	804-30-8
T4551	Acrivastine	87848-99-5
T4550	Ajmaline	4360-12-7
T4549	Tibolone	5630-53-5
T4548	Procaterol hydrochloride	81262-93-3
T4547	Grazoprevir	1350514-68-9
T4546	Dinoprost Tromethamine	38562-01-5
T4545	Propacetamol Hydrochloride	66532-86-3
T4544	Elbasvir	1370468-36-2
T4542	Clonixin	17737-65-4
T4538	palovarotene	410528-02-8
T4537	SodiumCholate	361-09-1
T4536	Pleconaril	153168-05-9
T4514	N-Acetyl-D-Glucosamine	7512-17-6
T4513	Vanillyl butyl ether	82654-98-6
T4512	Magnesium glycinate	14783-68-7
T4509	Inositol nicotinate	6556-11-2
T4507	Chlorphenesin	104-29-0
T4506	Gadopentetate dimeglumine	86050-77-3
T4505	Ferrous Bisglycinate	20150-34-9
T4504	Triclocarban	101-20-2
T4503	Talniflumate	66898-62-2
T4502	BISMUTH SUBGALLATE	99-26-3
T4501	Ceftizoxime	68401-81-0
T4499	Mequitazine	29216-28-2
T4498	Stiripentol	49763-96-4
T4497	Amifampridine	54-96-6
T4494	CLOZAPINE N-OXIDE	34233-69-7
T4493	Bictegravir	1611493-60-7
T4481	Tucidinostat	1616493-44-7
T4474	Asunaprevir	630420-16-5
T4463	Rucaparib	283173-50-2
T4462	Roflumilast N-oxide	292135-78-5
T4460	Dapagliflozin ((2S)-1,2-propanediol, hydrate)	960404-48-2
T4451	Estramustine phosphate sodium	52205-73-9
T4439	Choline glycerophosphate	28319-77-9
T4434	Tirapazamine	27314-97-2
T4429	Rauwolscine hydrochloride	6211-32-1
T4412	Roquinimex	84088-42-6
T4409	Gilteritinib	1254053-43-4
T4405	Ceftibuten dihydrate	118081-34-8
T4382	Proguanil hydrochloride	637-32-1
T4374	Edoxudine	15176-29-1
T4333	Quinine dihydrochloride	60-93-5
T4332	c-Kit-IN-1	1225278-16-9
T4320	Flumatinib	895519-90-1
T4313	Tinoridine hydrochloride	25913-34-2
T4297	Flibanserin	167933-07-5
T4285	Crisaborole	906673-24-3
T4284	(S)-Amlodipine Besylate (103129-82-4(free base))	T4284
T4277	Osilodrostat	928134-65-0
T4274	Melitracen hydrochloride	10563-70-9
T4271	Diroximel Fumarete	1577222-14-0
T4269	Buparvaquone	88426-33-9
T4260	Capmatinib 2HCl	1197376-85-4
T4250	Bilastine	202189-78-4
T4246	Varenicline	866823-63-4
T4226	Amenamevir	841301-32-4
T4203	Ledipasvir acetone	1441674-54-9
T4202	Delamanid	681492-22-8
T4201	Avibactam sodium	1192491-61-4
T4200	AHU377 calcium salt	1369773-39-6
T4195	Betahistine	5638-76-6
T4168	Visomitin	934826-68-3
T4121	Bicyclol	118159-48-1
T4117	Zuclopenthixol	53772-83-1
T4103	(L)-Sodium lactate	867-56-1
T4097	Vardenafil hydrochloride trihydrate	330808-88-3
T4093	Afobazole hydrochloride	173352-39-1
T4076	Fondaparinux sodium	114870-03-0
T4059	Selamectin	220119-17-5
T4056	Cyclizine hydrochloride	303-25-3
T4054	Dantrolene sodium hemiheptahydrate	24868-20-0
T4017	Relebactam	1174018-99-5
T4008	Metergoline	17692-51-2
T4006	Pentostatin	53910-25-1
T4000	(±)-Equol	94105-90-5
T3S2100	Securinine	5610-40-2
T3S2019	Lathyrol	34420-19-4
T3S1866	Propyl gallate	121-79-9
T3S1858	Lutein	127-40-2
T3S1553	Cinnamic aldehyde	14371-10-9
T3S0807	Berbamine	478-61-5
T3S0738	yangonin	500-62-9
T3S0717	Thymol	89-83-8
T3S0640	Glycerol trioleate	122-32-7
T3S0364	L-Arginine	74-79-3
T3S0309	Raffinose	17629-30-0
T3O2749	L-Leucine	61-90-5
T3996	Dapiprazole Hydrochloride	72822-13-0
T3979	Emedastine	87233-61-2
T3977	Lifitegrast	1025967-78-5
T3949	Myristic acid	544-63-8
T3948	Hendecanoic acid	112-37-8
T3947	Nonanoic acid	112-05-0
T3946	Caprylic acid	124-07-2
T3941	Choline Fenofibrate	856676-23-8
T3934	Isavuconazonium sulfate	946075-13-4
T3915	Ginsenoside Ro	34367-04-9
T3913	Saikosaponin D	20874-52-6
T3857	magnolin	31008-18-1
T3824	Jaceosidin	18085-97-7
T3823	D-Pinitol	10284-63-6
T3763	Fumaric acid	110-17-8
T3749	Pyrogallol	87-66-1
T3748	orcinol	504-15-4
T3746	Dimethyl phthalate	131-11-3
T3744	Veratric acid	93-07-2
T3741	(-)-borneol	464-45-9
T3736	Olivetol	500-66-3
T3732	Sebacic acid	111-20-6
T3729	Ethyl gallate	831-61-8
T3728	Methylparaben	99-76-3
T3726	Erdafitinib	1346242-81-6
T3724	Rolapitant hydrochloride	914462-92-3
T3719	Daminozide	1596-84-5
T3718	α-santonin	481-06-1
T3704	Lasmiditan	439239-90-4
T3698	alpha-Asarone	2883-98-9
T3684	CP21R7	125314-13-8
T3678	Entrectinib	1108743-60-7
T3671	Vitexin-2''-O-rhamnoside	64820-99-1
T3663	Eliglustat	491833-29-5
T3658	TAS102	733030-01-8
T3634	Osimertinib mesylate	1421373-66-1
T3632	Doravirine	1338225-97-0
T3630	Relugolix	737789-87-6
T3629	Gamithromycin	145435-72-9
T3626	Acalabrutinib	1420477-60-6
T3625	ETC1002	738606-46-7
T3623	Cobimetinib	934660-93-2
T3617	Ivosidenib	1448347-49-6
T3616	Carbazochrome	69-81-8
T3614	Isoprinosine	36703-88-5
T3610	Ranitidin	66357-35-5
T3605	Gastrodenol	57644-54-9
T3604	Sodium Dichloroacetate	2156-56-1
T3603	Sodium lauryl sulfoacetate	1847-58-1
T3602	D-Pantothenic acid sodium salt	867-81-2
T3578	Pyridoxal phosphate	54-47-7
T3551	Calcium pantothenate	137-08-6
T3547	Sotagliflozin	1018899-04-1
T3529	Bestatin hydrochloride	65391-42-6
T3524	Halofuginone hydrobromide	64924-67-0
T3523	Fostemsavir	864953-29-7
T3500	Flurbiprofen Axetil	91503-79-6
T3495	Tasimelteon	609799-22-6
T3489	Dasabuvir	1132935-63-7
T3465	Vesnarinone	81840-15-5
T3457	Olodaterol	868049-49-4
T3429	Protopine	130-86-9
T3428	Helicid	80154-34-3
T3416	Aucubin	479-98-1
T3402	Ginsenoside Rg3	14197-60-5
T3384	Wedelolactone	524-12-9
T3383	Cimifugin	37921-38-3
T3380	Homoharringtonine	26833-87-4
T3379	Decanoic Acid	334-48-5
T3377	phenylalanine	63-91-2
T3375	Verbascoside	61276-17-3
T3371	Quillaic Acid	631-01-6
T3370	Hederacoside C	14216-03-6
T3369	Nuciferine	475-83-2
T3368	Alpha-Hederin	27013-91-8
T3362	Eupatilin	22368-21-4
T3357	17 alpha-propionate	19608-29-8
T3355	Naloxegol oxalate	1354744-91-4
T3349	Tavaborole	174671-46-6
T3339	Sophoridine	6882-68-4
T3335	Darunavir Ethanolate	635728-49-3
T3334	Velpatasvir	1377049-84-7
T3327	Arteether	75887-54-6
T3316	Fluoromethalone	426-13-1
T3290	Pikamilone	34562-97-5
T3288	Sulfisomidine	515-64-0
T3287	Octenidine Dihydrochloride	70775-75-6
T3285	Eslicarbazepine Acetate	236395-14-5
T3284	Carazolol	57775-29-8
T3282	Trimeprazine tartrate	4330-99-8
T3281	Delapril Hydrochloride	83435-67-0
T3280	Disodium clodronate tetrahydrate	88416-50-6
T3278	Piribedil	3605-01-4
T3277	Tulobuterol hydrochloride	56776-01-3
T3276	Benorilate	5003-48-5
T3275	Nefazodone hydrochloride	82752-99-6
T3273	Bifendatatum	73536-69-3
T3272	Metamizole magnesium	63372-86-1
T3270	Dihydralazine sulphate	7327-87-9
T3269	Metadoxine	74536-44-0
T3268	Mildronate	76144-81-5
T3267	Potassium guaiacolsulfonate	78247-49-1
T3266	Lumefantrine	82186-77-4
T3265	Azathramycin	76801-85-9
T3264	Etilefrine hydrochloride	943-17-9
T3263	Cefminox Sodium	92636-39-0
T3262	Creatine phosphate disodium salt	922-32-7
T3258	Ponesimod	854107-55-4
T3254	PHYTOL	150-86-7
T3253	Castor oil	8001-79-4
T3246	Tabersonine	4429-63-4
T3245	(S)-(+)-Carvone	2244-16-8
T3243	Betaine	107-43-7
T3237	Lecithin	8002-43-5
T3233	Sophoricoside	152-95-4
T3232	Higenamine Hydrochloride	11041-94-4
T3231	Niraparib	1038915-60-4
T3227	Danshensu	76822-21-4
T3226	Paritaprevir	1221573-85-8
T3216	Selexipag	475086-01-2
T3211	Midostaurin	120685-11-2
T3197	Daprodustat	960539-70-2
T3170	Troglitazone	97322-87-7
T3165	Metoprolol Succinate	98418-47-4
T3159	Guaiazulene	489-84-9
T3154	Citral	5392-40-5
T3145	D-(+)-Trehalose dihydrate	6138-23-4
T3141	Bendazac L-lysine	81919-14-4
T3139	Sultamicillin Tosylate	83105-70-8
T3136	Methylcobalamin	13422-55-4
T3131	Phosphomycin calcium salt	26016-98-8
T3126	Bethanechol chloride	590-63-6
T3125	Amikacin Sulfate Salt	149022-22-0
T3124	Carbendazim	10605-21-7
T3122	(+)-Fangchinoline	436-77-1
T3121	Betulin	473-98-3
T3117	Marbofloxacin	115550-35-1
T3116	Atorvastatin Calcium	134523-03-8
T3115	Nicarbazin	330-95-0
T3114	Povidone-iodine	25655-41-8
T3112	Verteporfin	129497-78-5
T3111	LY2835219	1231930-82-7
T3098	Vorapaxar sulfate	705260-08-8
T3096	Potassium canrenoate	2181-04-6
T3095	Tyramine	51-67-2
T3093	Spermine Tetrahydrochloride	306-67-2
T3091	Carmustine	154-93-8
T3089	Thioguanine	154-42-7
T3088	N-Ethylmaleimide	128-53-0
T3067	Tideglusib	865854-05-3
T3061	Lorlatinib	1454846-35-5
T3060	Fasudil hydrochloride	105628-07-7
T3059	AP26113	1197958-12-5
T3054	Daurisoline	70553-76-3
T3052	Sancycline	808-26-4
T3044	Teriflunomide	108605-62-5
T3043	Ruxolitinib (INCB-18424) phosphate	1092939-17-7
T3039	Hederagenin	465-99-6
T3034	Eprazinone dihydrochloride	10402-53-6
T3033	Deoxycorticosterone acetate	56-47-3
T3027	Sodium Aescinate	20977-05-3
T3026	(-)-Huperzine A	102518-79-6
T3025	Asiaticoside	16830-15-2
T3020	Sclareol	515-03-7
T3017	Trenbolone acetate	10161-34-9
T3015	Olaparib	763113-22-0
T3004	Batyl alcohol	544-62-7
T3002	Piperine	94-62-2
T3001	Honokiol	35354-74-6
T3000	Magnolol	528-43-8
T2S2264	Linalool	78-70-6
T2S2172	nerolidol	7212-44-4
T2S2043	Dracorhodin perochlorate	125536-25-6
T2S1865	Octyl gallate	1034-01-1
T2S1464	Thiocolchicoside	602-41-5
T2S0850	Malic acid	6915-15-7
T2S0493	Isoeugenol	97-54-1
T2S0257	Dehydroandrographolide succinate	786593-06-4
T2S0157	Methyl hexadecanoate	112-39-0
T2S0122	Mandelic acid	611-71-2
T2S0007	Sodium ferulic	24276-84-4
T2P2923	Stearic acid	57-11-4
T2P2810	Methyl Linoleate	112-63-0
T2O2798	D-Trehalose	99-20-7
T2O2777	threonine	72-19-5
T2O2776	L-Valine	72-18-4
T2O2774	L-Asparagine	70-47-3
T2O2733	cystine	56-89-3
T2O2731	L-Aspartic acid	56-84-8
T2O2730	serine	56-45-1
T2O2728	glycine	56-40-6
T2O2721	cysteine	52-90-4
T2O2701	L(+)-Ornithine hydrochloride	3184-13-2
T2O2683	proline	147-85-3
T2O2680	Oxalic acid	144-62-7
T2O2668	Oleic acid	112-80-1
T2O2667	Methyl Oleate	112-62-9
T2O2666	Methyl stearate	112-61-8
T2A2532	histidine	71-00-1
T2A2509	Laurocapram	59227-89-3
T2A2498	lysine	56-87-1
T2A2497	glutamic acid	56-86-0
T2A2481	Taurochenodeoxycholic Acid	516-35-8
T2A2476	L-Hydroxyprolin	51-35-4
T2999	Gastrodin	62499-27-8
T2996	Tetrandrine	518-34-3
T2995	Chrysophanic Acid	481-74-3
T2989	4-Hydroxybenzoic acid	99-96-7
T2988	(-)-Epigallocatechin Gallate	989-51-5
T2984	Scopoletin	92-61-5
T2979	DL-Menthol	89-78-1
T2973	Astragaloside IV	84687-43-4
T2972	Rutaecarpine	84-26-4
T2970	Rotenone	83-79-4
T2969	Lawsone	83-72-7
T2968	Hyodeoxycholic acid	83-49-8
T2966	Beta-Sitosterol	83-46-5
T2965	Deoxycholic acid	83-44-3
T2963	Cholic Acid	81-25-4
T2961	Notoginsenoside R1	80418-24-2
T2957	Arctigenin	7770-78-7
T2954	Fructose	7660-25-5
T2953	Ligustrazine hydrochloride	76494-51-4
T2952	Camphor	76-22-2
T2946	Tanshinone IIA sulfonate sodium	69659-80-9
T2945	Germacrone	6902-91-6
T2944	Sodium Danshensu	67920-52-9
T2943	5-Hydroxymethyl-2-furaldehyde	67-47-0
T2942	Psoralen	66-97-7
T2941	Glucosamine hydrochloride	66-84-2
T2938	(E/Z)-Polydatin	65914-17-2
T2928	L-Rhamnose monohydrate	6155-35-7
T2927	Trigonelline hydrochloride	6138-41-6
T2923	Apremilast	608141-41-9
T2921	Sinomenine hydrochloride	6080-33-7
T2920	Berbamine dihydrochloride	6078-17-7
T2917	Tetrahydropalmatine hydrochloride	6024-85-7
T2916	Patchouli alcohol	5986-55-0
T2914	Melibiose	585-99-9
T2911	Stevioside	57817-89-7
T2909	Fraxetin	574-84-5
T2908	Palmitic acid	57-10-3
T2907	Tanshinone I	568-73-0
T2902	Costunolide	553-21-9
T2901	Daidzin	552-66-9
T2900	Paeonol	552-41-0
T2899	Liquiritin	551-15-5
T2898	Andrographolide	5508-58-7
T2891	Monoammonium glycyrrhizinate	53956-04-0
T2889	Isoferulic acid	537-73-5
T2886	Aleuritic Acid	533-87-9
T2885	Esculin	531-75-9
T2884	Cortisone	53-06-5
T2880	D-Cellobiose	528-50-7
T2876	Flavone	525-82-6
T2875	Isopsoralen	523-50-2
T2872	Ginsenoside Re	52286-59-6
T2871	Quercitrin	522-12-3
T2870	(+)-Matrine	519-02-8
T2869	Emodin	518-82-1
T2868	Evodiamine	518-17-2
T2865	Oleanolic Acid	508-02-1
T2863	p-Coumaric acid	501-98-4
T2861	Tyrosol	501-94-0
T2858	Baicalein	491-67-8
T2857	Gentisic acid	490-79-9
T2856	Epicatechin	490-46-0
T2854	Forsythin	487-41-2
T2852	Citropten	487-06-9
T2851	Daphnetin	486-35-1
T2850	(+)-Bicuculline	485-49-4
T2848	Osthole	484-12-8
T2847	Indigo	482-89-3
T2845	Imperatorin	482-44-0
T2844	Hyperoside	482-36-0
T2843	Aloe-emodin	481-72-1
T2836	Isorhamnetin	480-19-3
T2835	Morin	480-16-0
T2833	Dehydrocostus Lactone	477-43-0
T2832	S-Isocorydine(+)	475-67-2
T2828	Spiculisporic Acid	469-77-2
T2827	Asiatic acid	464-92-6
T2822	Ginsenoside Rb1	41753-43-9
T2815	Puerarin	3681-99-0
T2813	Madecassoside	34540-22-2
T2811	Harmine hydrochloride	343-27-1
T2807	Caffeic Acid	331-39-5
T2806	Lappaconitine	32854-75-4
T2805	Chlorogenic Acid	327-97-9
T2804	Panaxtriol	32791-84-7
T2801	Aristolochic Acid	313-67-7
T2800	L-Theanine	3081-61-6
T2798	Esculetin	305-01-1
T2797	Harmaline	304-21-2
T2796	Coenzyme Q10	303-98-0
T2795	Amygdalin	29883-15-6
T2792	Glucosamine sulfate	29031-19-4
T2789	Scutellarin	27740-01-8
T2780	Catalpol	2415-24-9
T2777	Ginsenoside Rg1	22427-39-0
T2775	Baicalin	21967-41-9
T2773	Vindoline	2182-14-1
T2768	Saikosaponin A	20736-09-8
T2767	Neohesperidin Dihydrochalcone	20702-77-6
T2765	Rosmarinic acid	20283-92-5
T2764	10-Hydroxycamptothecin	19685-09-7
T2762	Kasugamycin hydrochloride	19408-46-9
T2761	Naringin dihydrochalcone	18916-17-1
T2759	Loganin	18524-94-2
T2758	Madecassic acid	18449-41-7
T2756	Swertiamarin	17388-39-5
T2754	Oxymatrine	16837-52-8
T2752	2'-Deoxyadenosine monohydrate	16373-93-6
T2750	Ginkgolide C	15291-76-6
T2745	Glycyrrhetinic acid	1449-05-4
T2742	Aloin	1415-73-2
T2741	Glycyrrhizin	1405-86-3
T2740	Cinnamic acid	140-10-3
T2737	Neohesperidin	13241-33-3
T2736	Sodium Demethylcantharidate	13114-29-9
T2735	5-Acetylsalicylic acid	13110-96-8
T2734	Sennoside B	128-57-4
T2732	(-)-Epicatechin gallate	1257-08-5
T2731	Usnic Acid	125-46-2
T2729	Scoparone	120-08-1
T2728	Limonin	1180-71-8
T2727	Salvianolic acid B	115939-25-8
T2725	Scopolamine HBr	114-49-8
T2724	Caryophyllene oxide	1139-30-6
T2719	Succinic acid	110-15-6
T2718	Palmatine chloride	10605-02-4
T2717	Salidroside	10338-51-9
T2713	D-Stachyose tetrahydrate	10094-58-3
T2690	Tranilast	53902-12-8
T2687	Omeprazole sulfide	73590-85-9
T2686L	Esomeprazole Sodium	161796-78-7
T2686	Esomeprazole Magnesium	161973-10-0
T2677	Crenolanib	670220-88-9
T2671	Regadenoson	313348-27-5
T2656	Fruquintinib	1194506-26-7
T2648	Pimecrolimus	137071-32-0
T2609	Masitinib	790299-79-5
T2605	R788 Disodium	1025687-58-4
T2597	Norgestrel	6533-00-2
T2595	Lumacaftor	936727-05-8
T2594	Levomilnacipran	96847-55-1
T2593	Eflornithine hydrochloride Monohydrate	96020-91-6
T2592	Ropinirole hydrochloride	91374-20-8
T2590	Vismodegib	879085-55-9
T2589	Dalasetron Mesylate Hydrate	878143-33-0
T2588	Ivacaftor	873054-44-5
T2587	Ecabet Sodium	86408-72-2
T2586	Cabozantinib	849217-68-1
T2585	Bedaquiline	843663-66-1
T2583	Cilastatin	82009-34-5
T2580	Formoterol	73573-87-2
T2578	Didanosine	69655-05-6
T2577	Dienogest	65928-58-7
T2575	Guanethidine Monosulfate	645-43-2
T2574	Alizapride hydrochloride	59338-87-3
T2571	Benactyzine hydrochloride	57-37-4
T2570	Menadiol Diacetate	573-20-6
T2569	Chlorotrianisene	569-57-3
T2567	Etonogestrel	54048-10-1
T2565	Hesperetin	520-33-2
T2563	O-Acetyl-L-carnitine hydrochloride	5080-50-2
T2562	Eltrombopag	496775-61-2
T2561	Macitentan	441798-33-0
T2559	Allylestrenol	432-60-0
T2558	Cladribine	4291-63-8
T2556	Nandrolone decanoate	360-70-3
T2555	Aclidinium bromide	320345-99-1
T2554	Etofibrate	31637-97-5
T2553	Etofenamate	30544-47-9
T2552	Succimer	304-55-2
T2551	Etravirine	269055-15-4
T2550	Tolmetin	26171-23-3
T2549	Robenidine hydrochloride	25875-50-7
T2548	Diflorasone	2557-49-5
T2546	Pimozide	2062-78-4
T2544	Bazedoxifene acetate	198481-33-3
T2543	Cabazitaxel	183133-96-2
T2542	Prucalopride	179474-81-8
T2539	Fingolimod hydrochloride	162359-56-0
T2538	Bimatoprost	155206-00-1
T2537	Tirofiban hydrochloride monohydrate	150915-40-5
T2535	Ivabradine hydrochloride	148849-67-6
T2534	Pitavastatin calcium	147526-32-7
T2533	Alcaftadine	147084-10-4
T2532	Tauroursodeoxycholic Acid	14605-22-2
T2531	Eprosartan Mesylate	144143-96-4
T2530	Levosimendan	141505-33-1
T2529	Zanamivir	139110-80-8
T2528	Latanoprost	130209-82-4
T2527	Ulipristal acetate	126784-99-4
T2526	Ciclesonide	126544-47-6
T2525	Alosetron hydrochloride	122852-69-1
T2524	Dexmedetomidine	113775-47-6
T2523	Rufinamide	106308-44-5
T2522	Peramivir Trihydrate	1041434-82-5
T2520	Desloratadine	100643-71-8
T2519	Lercanidipine	100427-26-7
T2515	Roxadustat	808118-40-3
T2512	Mocetinostat	726169-73-9
T2509	Tozasertib	639089-54-6
T2508	Binimetinib	606143-89-9
T2500	Cediranib	288383-20-0
T2499	Torcetrapib	262352-17-0
T2492	Perifosine	157716-52-4
T2490	Osimertinib	1421373-65-0
T2485	Baricitinib	1187594-09-7
T2483	Dacomitinib	1110813-31-4
T2481	Ascomycin	104987-12-4
T2456	Tivozanib	475108-18-0
T2438	HMN214	173529-46-9
T2411	Luliconazole	187164-19-8
T2410	Nedaplatin	95734-82-0
T2409L	Tenofovir Disoproxil Fumarate	202138-50-9
T2409	Tenofovir alafenamide	379270-37-8
T2406	Cinacalcet hydrochloride	364782-34-3
T2405	Revaprazan hydrochloride	178307-42-1
T2404	Vonoprazan fumarate	1260141-27-2
T2403	Bromfenac sodium	120638-55-3
T2402	Tianeptine sodium	30123-17-2
T2401	Alogliptin Benzoate	850649-62-6
T2400	Candesartan Cilexetil	145040-37-5
T2399	Bortezomib	179324-69-7
T2398	Tofacitinib Citrate	540737-29-9
T2397	Topiroxostat	577778-58-6
T2396	Ramatroban	116649-85-5
T2395L	Vortioxetine HBr	960203-27-4
T2395	Vortioxetine	508233-74-7
T2394	Pixantrone dimaleate	144675-97-8
T2393	Efavirenz	154598-52-4
T2392	Nafamostat mesylate	82956-11-4
T2391	Camostat mesilate	59721-29-8
T2389	Dapagliflozin	461432-26-8
T2388	Nalfurafine hydrochloride	152658-17-8
T2387	Glycopyrrolate	596-51-0
T2386	Pirfenidone	53179-13-8
T2385	Ipragliflozin	761423-87-4
T2384	Pomalidomide	19171-19-8
T2383	Panobinostat	404950-80-7
T2382	Vemurafenib	918504-65-1
T2381	Abemaciclib	1231929-97-7
T2372	Ponatinib	943319-70-8
T2369	Rociletinib	1374640-70-6
T2368L	Edoxaban	912273-65-5
T2368	Edoxaban Tosylate Monohydrate	1229194-11-9
T2366	Tipiracil hydrochloride	183204-72-0
T2364	Irbinitinib	937263-43-9
T2360	Baricitinib Phosphate	1187595-84-1
T2346	Enasidenib	1446502-11-9
T2339	Apalutamide	956104-40-8
T2336	Menatetrenone	11032-49-8
T2335	Ebastine	90729-43-4
T2334	Avanafil	330784-47-9
T2333	Efinaconazole	164650-44-6
T2332	Elvitegravir	697761-98-1
T2330	Rilpivirine	500287-72-9
T2329	Dolutegravir sodium	1051375-19-9
T2328	Radotinib	926037-48-1
T2326	Tolvaptan	150683-30-0
T2325	Neratinib	698387-09-6
T2324	Darunavir	206361-99-1
T2323	Efonidipine	111011-63-3
T2322	Fimasartan	247257-48-3
T2320	Indacaterol	312753-06-3
T2319	Acotiamide hydrochloride	773092-05-0
T2318	LCZ696	936623-90-4
T2317	Almotriptan Malate	181183-52-8
T2316	Omarigliptin	1226781-44-7
T23133	Pentamidine	100-33-4
T2306	Brexpiprazole	913611-97-9
T2305	Isavuconazole	241479-67-4
T2303	Afatinib	439081-18-2
T2296	Trelagliptin succinate	1029877-94-8
T2279	Tizoxanide	173903-47-4
T2270	Trans-Tranilast	70806-55-2
T2269	Pirinixic Acid	50892-23-4
T2263	VX661	1152311-62-0
T22459	Xanthinol Nicotinate	437-74-1
T22455	Vindesine sulfate	59917-39-4
T2239L	Raltegravir	518048-05-0
T2239	Raltegravir potassium	871038-72-1
T22371	Mivacurium chloride	106861-44-3
T22368	Metyrosine	672-87-7
T22355	Levothyroxine sodium	55-03-8
T22314	Doripenem	148016-81-3
T2231	17-Beta-Estradiol-3,17-Dipropionate	113-38-2
T2230	Paeoniflorin	23180-57-6
T2228	Adipic acid	124-04-9
T2226	Pergolide mesylate salt	66104-23-2
T22253	AG-120 (racemic)	1448346-63-1
T2225	4-Hydroxyantipyrine	1672-63-5
T22246	Argatroban Monohydrate	141396-28-3
T22235	Lipoic acid	1200-22-2
T2223	Kinetin	525-79-1
T2222	Carbinoxamine Maleate Salt	3505-38-2
T2221	Uridine	58-96-8
T2220	2-Methoxyestradiol	362-07-2
T2219	Puromycin dihydrochloride	58-58-2
T2217	Cephalomannine	71610-00-9
T2216	Entacapone	130929-57-6
T2215	Ferulic Acid	1135-24-6
T2213	Terconazole	67915-31-5
T2212	Geniposide	24512-63-8
T2210	Genipin	6902-77-8
T2209	Serotonin hydrochloride	153-98-0
T2207	Adrenosterone	382-45-6
T2205	Theophylline-7-acetic acid	652-37-9
T2204	Diaveridine	5355-16-8
T2203	L-Carnitine hydrochloride	10017-44-4
T2202	Lithocholic acid	434-13-9
T2201	6-Mercaptopurine monohydrate	6112-76-1
T2200	Hydroxyzine dihydrochloride	2192-20-3
T2199	Myclobutanil	88671-89-0
T2198	Arecoline HBr	300-08-3
T2196	Fipronil	120068-37-3
T2195	Epiandrosterone	481-29-8
T2191	Tacrine hydrochloride hydrate	206658-92-6
T2188	Thonzonium Bromide	553-08-2
T2187	2-Aminobenzenesulfonamide	3306-62-5
T2184L	Sulfamethazine sodium salt	1981-58-4
T2184	Sulfachloropyridazine	80-32-0
T2183	Scopolamine butylbromide	149-64-4
T2182	Scopolamine HBr trihydrate	6533-68-2
T2181	Scopolamine N-oxide HBr	6106-81-6
T2179	Triptolide	38748-32-2
T2177	Kaempferol	520-18-3
T2175	Apigenin	520-36-5
T2174	Quercetin	117-39-5
T2163	Dihydrocapsaicin	19408-84-5
T2150	Guanfacine hydrochloride	29110-48-3
T2149	Eburnalritardo	4880-88-0
T2148	Carbidopa Hydrate	38821-49-7
T2147	Nilotinib (monohydrochloride monohydrate)	923288-90-8
T21469	Cyclopenthiazide	742-20-1
T2146	Fulvestrant	129453-61-8
T2145	Temsirolimus	162635-04-3
T21446	Rotigotine Hydrochloride	125572-93-2
T2144	Tacrolimus	104987-11-3
T2143	Bergapten	484-20-8
T21422	Methylnaltrexone bromide	73232-52-7
T2142	Yohimbine hydrochloride	65-19-0
T2141	Mecamylamine hydrochloride	826-39-1
T21402	Remimazolam	308242-62-8
T2140	Parthenolide	20554-84-1
T21383	Dextrothyroxine	51-49-0
T2137	Ibudilast	50847-11-5
T2136	Geniposidic Acid	27741-01-1
T2134	Dorzolamide hydrochloride	130693-82-2
T2132	Buspirone hydrochloride	33386-08-2
T21312	Afatinib free base	850140-72-6
T21311	Testolactone	968-93-4
T2131	Articaine HCl	23964-57-0
T21300	Trientine-2HCl	38260-01-4
T21294	Polmacoxib	301692-76-2
T2125	Trametinib	871700-17-3
T2122	Ixazomib	1072833-77-2
T2119	ABT199	1257044-40-8
T2115	Pexidartinib	1029044-16-3
T2112	Fexinidazole	59729-37-2
T21066	Norepinephrine bitartrate salt	3414-63-9
T2096	Neomycin Sulphate B	4146-30-9
T20765	Atorvastatin	134523-00-5
T2076	Pimavanserin	706779-91-1
T2066	Quizartinib	950769-58-1
T2046	Nimorazole	6506-37-2
T20293	Phenoxyethanol	122-99-6
T2025	Chidamide	743420-02-2
T2016	MLN9708	1201902-80-8
T20089	Adenosine triphosphate	56-65-5
T20063	Testosterone cypionate	58-20-8
T19965	Dacomitinib hydrate	1042385-75-0
T1995	Fedratinib	936091-26-8
T1988	Duvelisib	1201438-56-3
T19862	Voxilaprevir	1535212-07-7
T19663	Triheptanoin	620-67-7
T19651	Isoflurane	26675-46-7
T19644	Benzonatate	104-31-4
T1963	Capmatinib	1029712-80-8
T1951	Asenapine Maleate	85650-56-2
T1946	Felbamate	25451-15-4
T1936	Alectinib	1256580-46-7
T1929	Filgotinib	1206161-97-8
T19288	DL-Arginine	7200-25-1
T1926	NVP-LDE225	956697-53-3
T1921	Alpelisib	1217486-61-7
T1912	Dinaciclib	779353-01-4
T1903	Dabrafenib	1195765-45-7
T1894	Idelalisib	870281-82-6
T1890	Pracinostat	929016-96-6
T1882	Methylisoindigotin	97207-47-1
T1872	Fenretinide	65646-68-6
T1864	Fabomotizole	173352-21-1
T1852	Belinostat	414864-00-9
T1844	KPT330	1421923-86-5
T1835	Ibrutinib	936563-96-1
T1829	Ruxolitinib	941678-49-5
T1822L	Clemizole hydrochloride	1163-36-6
T1822	Clemizole	442-52-4
T1805	Ataluren	775304-57-9
T1797	Cabozantinib Malate	1140909-48-3
T1795	Carfilzomib	868540-17-4
T1794	Micafungin sodium	208538-73-2
T1792	Regorafenib	755037-03-7
T1791L	LDK378 dihydrochloride	1380575-43-8
T1791	LDK378	1032900-25-6
T1790	Fosaprepitant dimeglumine	265121-04-8
T1789	Obeticholic Acid	459789-99-2
T1788	EPZ6438	1403254-99-8
T1787	Levobupivacaine	27262-47-1
T1786	Daclatasvir dihydrochloride	1009119-65-6
T1785	Palbociclib	571190-30-2
T1784	Everolimus	159351-69-6
T1782	Canagliflozin	842133-18-0
T1780	Parecoxib	198470-84-7
T1777	Nintedanib	656247-17-5
T1776L	Plerixafor 8HCl (AMD3100 8HCl)	155148-31-5
T1773	Afatinib Dimaleate	850140-73-7
T1766	Empagliflozin	864070-44-0
T1756	Ilaprazole sodium	172152-50-0
T1747	Torezolid	856866-72-3
T1743	Aprepitant	170729-80-3
T1738	Taxifolin	480-18-2
T1737	Genistein	446-72-0
T1736	Apixaban	503612-47-3
T1735	Lurasidone hydrochloride	367514-88-3
T1734	Rabeprazole Related Compound E	117977-21-6
T17310	Phenylephrine	59-42-7
T1723	ADP	58-64-0
T17226	Vericiguat	1350653-20-1
T1721	2'-Deoxyuridine	951-78-0
T1720	Amfenac Sodium Monohydrate	61618-27-7
T17199	Udenafil	268203-93-6
T1716	Echinacoside	82854-37-3
T17159	Treosulfan	299-75-2
T1711	Harmine	442-51-3
T1709	2'-Deoxyinosine	890-38-0
T1708	Pimobendan	74150-27-9
T1704	Diosmetin	520-34-3
T17035	Temoporfin	122341-38-2
T17030	Tegoprazan	942195-55-3
T17026	Tecovirimat	869572-92-9
T1693	7-Hydroxycoumarin	93-35-6
T1687L	Doxycycline hyclate	24390-14-5
T1686	Hematoxylin	517-28-2
T1684	Nitisinone	104206-65-7
T1682	Methacholine Chloride	62-51-1
T1681	Aminophylline	317-34-0
T1680	Tolazoline hydrochloride	59-97-2
T1677L	Montelukast sodium	151767-02-1
T1676	Rosuvastatin	287714-41-4
T1675	Adefovir dipivoxil	142340-99-6
T1674	Nateglinide	105816-04-4
T1673	Acamprosate calcium	77337-73-6
T1672	Dimesna	16208-51-8
T1671	Mirabegron	223673-61-8
T1670	Lanatoside C	17575-22-3
T1669	Liothyronine sodium	55-06-1
T1668	Vinblastine sulfate	143-67-9
T1666	Fludrocortisone acetate	514-36-3
T1662	5-Aminolevulinic acid hydrochloride	5451-09-2
T1661	Crizotinib	877399-52-5
T1660	Silibinin	22888-70-6
T1659	Melatonine	73-31-4
T1658	Selenomethionine	1464-42-2
T1657	Varenicline Tartrate	375815-87-5
T1656	Vandetanib	443913-73-3
T1655	Ambrisentan	177036-94-1
T1654	Pentamidine isethionate	140-64-7
T1653	O-(4-Hydroxy-3-iodophenyl)-3,5-diiodo-L-tyrosine	6893-02-3
T1652	Betamethasone	378-44-9
T1651	Rebeprazole sodium	117976-90-6
T1650	Chlorzoxazone	95-25-0
T1649	Tenofovir	147127-20-6
T1648	Vitamin E	59-02-9
T16471	Perflubron	423-55-2
T1647	Ronidazole	7681-76-7
T1646	Famciclovir	104227-87-4
T1645	Ramipril	87333-19-5
T1644	Dopamine hydrochloride	62-31-7
T1643	Penciclovir	39809-25-1
T1642	Lenalidomide	191732-72-6
T16398	Opicapone	923287-50-7
T1639	Amlexanox	68302-57-8
T1638	N-Acetylneuraminic acid	131-48-6
T1637	Deferoxamine Mesylate	138-14-7
T1636	Paroxetine hydrochloride	78246-49-8
T1635	Fenchlorphos	299-84-3
T1634	Glyburide	10238-21-8
T1633	Beta-Carotene	7235-40-7
T1632	Amitraz	33089-61-1
T1631	Sulbactam	68373-14-8
T1630	Tiopronin	1953-02-2
T1629	Rifapentine	61379-65-5
T1628	Rivastigmine tartrate	129101-54-8
T1627	Famotidine	76824-35-6
T1626	Alprostadil	745-65-3
T1625	Lomefloxacin hydrochloride	98079-52-8
T1624	Neostigmine bromide	114-80-7
T1623	Lopinavir	192725-17-0
T1622	Rosiglitazone maleate	155141-29-0
T1621	Imatinib Mesylate	220127-57-1
T1620	Pazufloxacin Mesylate	163680-77-1
T1619	Trazodone hydrochloride	25332-39-2
T1618	Dypyridamole	58-32-2
T1617	Enrofloxacin	93106-60-6
T1616	Cefotiam hydrochloride	66309-69-1
T1615	Irbesartan	138402-11-6
T1614	Hydrocortisone	50-23-7
T1613	Hydralazine hydrochloride	304-20-1
T1612	Hodostin	51-60-5
T1611	Isotretinoin	4759-48-2
T1610	Metaxalone	1665-48-1
T1609	NAD+	53-84-9
T1604	Tiratricol	51-24-1
T1603	Glipizide	29094-61-9
T1602	Valproic acid sodium salt	1069-66-5
T1601	Lomustine	13010-47-4
T1600	Doxifluridine	3094-09-5
T1598	Rimantadine hydrochloride	1501-84-4
T1597	Proadifen hydrochloride	62-68-0
T1596	Chlormadinone acetate	302-22-7
T1595	Nevirapine	129618-40-2
T1594	Vecuronium bromide	50700-72-6
T1593	Ezetimibe	163222-33-1
T1592	Acetohydroxamic acid	546-88-3
T1591L	Cytidine	65-46-3
T1591	Cyclocytidine hydrochloride	10212-25-6
T1590	Letrozole	112809-51-5
T1589	D-Cycloserine	68-41-7
T1587	Exemestane	107868-30-4
T1586	Tenoxicam	59804-37-4
T1585	Metolazone	17560-51-9
T1584	Terbutaline Sulfate	23031-32-5
T1583	Vorinostat	149647-78-9
T1582L	Naproxen sodium	26159-34-2
T1582	Naproxen	22204-53-1
T1580	Desvenlafaxine	93413-62-8
T1579	Mestranol	72-33-3
T1578	Pargyline hydrochloride	306-07-0
T1577	Midodrine hydrochloride	3092-17-9
T1576	Iopamidol	60166-93-0
T15757	Limaprost	74397-12-9
T1575	Nizatidine	76963-41-2
T1574	Etoricoxib	202409-33-4
T15732	Ribociclib succinate	1374639-75-4
T1573	Flunisolide	3385-03-3
T15727	Erismodegib diphosphate	1218778-77-8
T15719	Latanoprostene bunod	860005-21-6
T1571	Estriol	50-27-1
T15707	Laninamivir	203120-17-6
T1570	Telmisartan	144701-48-4
T1569	Tigecycline	220620-09-7
T1568	Amoxapine	14028-44-5
T1567	Olanzapine	132539-06-1
T1566	Aripiprazole	129722-12-9
T1565	Deferidone	30652-11-0
T1564	Cisplatin	15663-27-1
T1563	Nifuroxazide	965-52-6
T1562	Rebamipide	90098-04-7
T1561	Clobetasol propionate	25122-46-7
T1560	Prednisolone	50-24-8
T1559	Betamethasone dipropionate	5593-20-4
T15588	Iobenguane sulfate	87862-25-7
T1558	Resveratrol	501-36-0
T1556	Ornidazole	16773-42-5
T1555	Diclofenac sodium	15307-79-6
T1553	Chlorpheniramine maleate	113-92-8
T1552	Itopride hydrochloride	122892-31-3
T1551	Tegaserod maleate	189188-57-6
T1550	Thiamphenicol	15318-45-3
T1549	Raloxifene hydrochloride	82640-04-8
T1548	8-Methoxypsoralen	298-81-7
T15477	Hexaminolevulinate hydrochloride	140898-91-5
T1546	Nitazoxanide	55981-09-4
T1544	Olsalazine disodium	6054-98-4
T1543	Naftifine hydrochloride	65473-14-5
T1542	Pirenzepine dihydrochloride	29868-97-1
T1541	Drospirenone	67392-87-4
T1540	Doxepin hydrochloride	1229-29-4
T15393	Glycerol phenylbutyrate	611168-24-2
T1539	Iloperidone	133454-47-4
T1537	Rapamycin	53123-88-9
T1536	Promestriene	39219-28-8
T1535	Sodium Phenylbutyrate	1716-12-7
T1534	Darifenacin HBr	133099-07-7
T1533	Valganciclovir hydrochloride	175865-59-5
T1532	Pidotimod	121808-62-6
T1531	Mometasone furoate	83919-23-7
T1530	Mitiglinide calcium	207844-01-7
T1529	Miglitol	72432-03-2
T1528	Azasetron hydrochloride	123040-16-4
T1527	Gliclazide	21187-98-4
T15261	Evocalcet	870964-67-3
T1526	Nifuratel	4936-47-4
T1525	Ritonavir	155213-67-5
T1524	Nilotinib	641571-10-0
T1523	Teniposide	29767-20-2
T1522	Iopromide	73334-07-3
T15219	Enarodustat	1262132-81-9
T1521	Hydroxy Camptothecine	64439-81-2
T1520	Aliskiren hemifumarate	173334-58-2
T1519L	Rimonabant	168273-06-1
T1519	Rimonabant hydrochloride	158681-13-1
T1518	Olmesartan Medoxomil	144689-63-4
T1517	Benserazide hydrochloride	14919-77-8
T1516	Curcumin	458-37-7
T1514	Norethindrone	68-22-4
T1513	Telbivudine	3424-98-4
T1512	Rizatriptan benzoate	145202-66-0
T1511	Daunorubicin hydrochloride	23541-50-6
T1509	Cyclobenzaprine hydrochloride	6202-23-9
T1508	Decitabine	2353-33-5
T1507	Streptozocin	18883-66-4
T1506	Vidarabine	5536-17-4
T1505	Imipenem monohydrate	74431-23-5
T1504	Silodosin	160970-54-7
T1503	Esmolol hydrochloride	81161-17-3
T1502	Vildagliptin	274901-16-5
T1501	Rifabutin	72559-06-9
T1500	Xylazine hydrochloride	23076-35-9
T14998	Copanlisib dihydrochloride	1402152-13-9
T1499	Dutasteride	164656-23-9
T1498	Indapamide	26807-65-8
T1497	Liranaftate	88678-31-3
T1496	Amiodarone hydrochloride	19774-82-4
T1495	Cefaclor monohydrate	70356-03-5
T14935	Elexacaftor	2216712-66-0
T1492	Gemifloxacin mesylate	210353-53-0
T1491	Atovaquone	95233-18-4
T1490	Gestodene	60282-87-3
T1489	Fosinopril sodium	88889-14-9
T1487	Fluvastatin sodium salt	93957-55-2
T14865	Carboprost tromethamine	58551-69-2
T1486	Oseltamivir phosphate	204255-11-8
T14856	Calcipotriol	112965-21-6
T14853	Cabergoline	81409-90-7
T1485	Methotrexate	59-05-2
T1484L	Perindopril erbumine	107133-36-8
T14830	Bromperidol	10457-90-6
T1483	Citalopram HBr	59729-32-7
T1482	Ciclopirox	29342-05-0
T1481	Fudosteine	13189-98-5
T1480	Danazol	17230-88-5
T1479	Isosorbide dinitrate	87-33-2
T1478	Ondansetron hydrochloride	103639-04-9
T1477	AICAR (Acadesine)	2627-69-2
T1475	Fesoterodine fumarate	286930-03-8
T1474	Otilonium bromide	26095-59-0
T1473	Trilostane	13647-35-3
T1472	Trospium chloride	10405-02-4
T1471	Duloxetine hydrochloride	136434-34-9
T1470L	Fexofenadine hydrochloride	138452-21-8
T1469	Levocetirizine	130018-77-8
T1468	Lornoxicam	70374-39-9
T1467	Acemetacin	53164-05-9
T1466	Nadifloxacin	124858-35-1
T1465	Mupirocin	12650-69-0
T1464	Toremifene citrate	89778-27-8
T1463	Ramelteon	196597-26-9
T1462	Captopril	62571-86-2
T1461	Candesartan	139481-59-7
T1460	Dicyclomine hydrochloride	67-92-5
T1459	Cisatracurium besylate	96946-42-8
T1458	Epalrestat	82159-09-9
T1457	Deferasirox	201530-41-8
T1454	Aciclovir	59277-89-3
T1453	Phenformin hydrochloride	834-28-6
T1452	Axitinib	319460-85-0
T1451	Levofloxacin Hemihydrate	138199-71-0
T14495	Baloxavir	1985605-59-1
T1449	Hydrochlorothiazide	58-93-5
T1448L	Dasatinib monohydrate	863127-77-9
T1448	Dasatinib	302962-49-8
T1446	Bambuterol hydrochloride	81732-46-9
T1445	Agomelatine	138112-76-2
T1444	Lomefloxacin	98079-51-7
T1443	Memantine hydrochloride	41100-52-1
T1442	Pizotifen	15574-96-6
T1440	Ethacridine lactate monohydrate	6402-23-9
T1439	Lacidipine	103890-78-4
T1438	Butoconazole nitrate	64872-77-1
T1437	Dexpanthenol	81-13-0
T1436	4-Aminohippuric Acid	61-78-9
T1435	Praziquantel	55268-74-1
T1434	Clarithromycin	81103-11-9
T1433	Ritodrine hydrochloride	23239-51-2
T1432	Phenylbutazone	50-33-9
T1431	Khellin	82-02-0
T1430	Betamipron	3440-28-6
T14291	Anisindione	117-37-3
T1429	Hydroxyprogesterone	68-96-2
T1428	Trifluridine	70-00-8
T1427	Fosfosal	6064-83-1
T1426	Pyrazinamide	98-96-4
T1425	Pemirolast potassium	100299-08-9
T1424	Ethynyl estradiol	57-63-6
T1422	Nilvadipine	75530-68-6
T1421	Aceclofenac	89796-99-6
T1420	Diethylcarbamazine citrate	1642-54-2
T1419	Azithromycin dihydrate	117772-70-0
T1418	Bucladesine sodium salt	16980-89-5
T1417	Mechlorethamine hydrochloride	55-86-7
T1416	Zidovudine	30516-87-1
T1415	Gemfibrozil	25812-30-0
T1414	Mesna	19767-45-4
T14128	Adenosylcobalamin	13870-90-1
T1412	Loxapine succinate salt	27833-64-3
T1411	Terbinafine hydrochloride	78628-80-5
T1410	Torasemide	56211-40-6
T1409	Methocarbamol	532-03-6
T1408	Capecitabine	154361-50-9
T1407	L-Menthol	2216-51-5
T1406	Amantadine hydrochloride	665-66-7
T1405	Cefditoren pivoxil	117467-28-4
T1404	Stavudine	3056-17-5
T1403	Climbazole	38083-17-9
T1402	Fenofibric acid	42017-89-0
T1401	Meclofenoxate hydrochloride	3685-84-5
T1400	Demeclocycline hydrochloride	64-73-3
T1399	Sucralose	56038-13-2
T1398	Tadalafil	171596-29-5
T1396	Bemegrid	64-65-3
T1395	Diatrizoic Acid	117-96-4
T1394	Ibuprofen	15687-27-1
T1393	Sodium butanoate	156-54-7
T1391	4-Methylumbelliferone	90-33-5
T1390	Panthenol	16485-10-2
T1389	Dyclonine hydrochloride	536-43-6
T1388	Fluconazole	86386-73-4
T1387	Acetylleucine	99-15-0
T1386	Phenazopyridine hydrochloride	136-40-3
T1385	Amlodipine	88150-42-9
T1384	Chlorpromazine hydrochloride	69-09-0
T1382	Griseofulvin	126-07-8
T1379	L-5-Hydroxytryptophan	4350-09-8
T1378	Tegafur	17902-23-7
T13730	Hydroxocobalamin acetate	22465-48-1
T13693	Fibrin	9001-31-4
T13655	DL-Norepinephrine hydrochloride	55-27-6
T1365	Thioisonicotinamide	2196-13-6
T1364	Cefalexine EP IMpurity B	22252-43-3
T1362	6-Hydroxypurine	68-94-0
T1352	Adenosine 5'-triphosphate disodium salt	987-65-5
T1343L	Crystal Violet	548-62-9
T1339	5-Azacytidine	320-67-2
T1337	Pamidronate disodium salt	57248-88-1
T1336	Benztropine mesylate	132-17-2
T1335	Mycophenolic acid	24280-93-1
T1334	Hydroquinidine	1435-55-8
T1333	Tolazamide	1156-19-0
T1332	Permethrin	52645-53-1
T1331	Flavin mononucleotide	130-40-5
T1330	Acitretin	55079-83-9
T1328	DL-trihexyphenidyl hydrochloride	58947-95-8
T1327	Nortriptyline hydrochloride	894-71-3
T1326	Gentamycin sulfate	1405-41-0
T1325	Carprofen	53716-49-7
T13236L	Oliceridine hydrochloride	1401031-39-7
T1323	Artemether	71963-77-4
T1322	Bendazol	621-72-7
T1321	Nonivamide	2444-46-4
T13202	Trilaciclib hydrochloride	1977495-97-8
T1320	Disopyramide	3737-09-5
T1319	Diatrizoate sodium	737-31-5
T1318	Ouabain octahydrate	11018-89-6
T13177L	Tocainide	41708-72-9
T1317	Cinchonidine	485-71-2
T13164	Tipepidine hydrochloride	1449686-84-3
T1314	Triclosan	3380-34-5
T1313	Nitrofurantoin	67-20-9
T1312	nafcillin sodium	7177-50-6
T1311	4-aminobenzoic acid	150-13-0
T1310	Deracil	141-90-2
T1309	Propylthiouracil	51-52-5
T1308	Orphenadrine hydrochloride	341-69-5
T13072	Taltirelin acetate	1549593-23-8
T1307	Carmofur	61422-45-5
T1306	Norfloxacin	70458-96-7
T1305	Ceftazidime	72558-82-8
T1304	Chlortetracycline hydrochloride	64-72-2
T1303	Auranofin	34031-32-8
T13013	Sodium stibogluconate	16037-91-5
T1301	Guaiacol	90-05-1
T1300	Propofol	2078-54-8
T1299	Roniacol	100-55-0
T1298	Clofibrate	637-07-0
T1297	Eugenol	97-53-0
T1296	Aminopar	65-49-6
T12952	Sodium citrate dihydrate	6132-04-3
T1294	Fleroxacin	79660-72-3
T1293	Gatifloxacin	112811-59-3
T1292	Tiapride hydrochloride	51012-33-0
T1291	Cisapride	81098-60-4
T1290	Oxiconazole nitrate	64211-46-7
T1289	Sodium fusidate	751-94-0
T1287	Synephrine	94-07-5
T1286	Vincamine	1617-90-9
T1285	Anethole trithione	532-11-6
T1284	Megestrol acetate	595-33-5
T12829	Salmeterol	89365-50-4
T1282	Carteolol hydrochloride	51781-21-6
T1281	Tropicamide	1508-75-4
T1280	Nepafenac	78281-72-8
T1279	Vilazodone	163521-12-8
T1278	Astemizole	68844-77-9
T1277	Lincomycin hydrochloride	859-18-7
T1276	Danofloxacin mesylate	119478-55-6
T1275	Phentolamine mesilate	65-28-1
T1274	Benzbromarone	3562-84-3
T1273	Diacerein	13739-02-1
T1272	Cytarabine	147-94-4
T1270	Vincristine sulfate	2068-78-2
T1269	Tripelennamine hydrochloride	154-69-8
T1267	Abacavir	136470-78-5
T1266	Terfenadine	50679-08-8
T1265	Amrinone	60719-84-8
T12643	(R)-Terazosin	109351-34-0
T1264	Ciprofibrate	52214-84-3
T1263	Levonorgestrel	797-63-7
T1262	Tazobactam acid	89786-04-9
T1261	Medroxyprogesterone Acetate	71-58-9
T1260	Sodium cromoglycate	15826-37-6
T1259	Pyrantel pamoate	22204-24-6
T1258	Nabumetone	42924-53-8
T1257	Ubenimex	58970-76-6
T1255	Tobramycin	32986-56-4
T1254	Chlorophyllin	11006-34-1
T1252	PAMBA	56-91-7
T1250	Triethylenethiophosphoramide	52-24-4
T1249	Beclamide	501-68-8
T12478	Pinacidil monohydrate	85371-64-8
T1247	Clonidine hydrochloride	4205-91-8
T1246	Bornyl acetate	76-49-3
T12441	Phenelzine sulfate	156-51-4
T1243	Hydrocortisone acetate	50-03-3
T1242	Alvimopan	156053-89-3
T1241	Altretamine	645-05-6
T12408	Perhexiline maleate	6724-53-4
T12401	Pemigatinib	1513857-77-6
T1240	Flumazenil	78755-81-4
T1239	Indacaterol maleate	753498-25-8
T1238	Daidzein	486-66-8
T1237	Azathioprine	446-86-6
T1235	Lincomycin hydrochloride monohydrate	7179-49-9
T1234	5,5-Dimethyloxazolidine-2,4-dione	695-53-4
T1233	Oxolinic acid	14698-29-4
T1232	Pyrilamine maleate	59-33-6
T12317	Orelabrutinib	1655504-04-3
T1231	Pilocarpine nitrate	148-72-1
T1230	Pamabrom	606-04-2
T1229	Erdosteine	84611-23-4
T1228	Cefonicid sodium	61270-78-8
T1227	Cepazine	64544-07-6
T1224	Cefuroxime sodium	56238-63-2
T1223	Ceftriaxone sodium	104376-79-6
T1222	Trifluoperazine dihydrochloride	440-17-5
T1221	Acetylcholine chloride	60-31-1
T1220	Ethidium bromide	1239-45-8
T1219	Sisomicin Sulfate	53179-09-2
T1217	Butenafine hydrochloride	101827-46-7
T1216	Diethylstilbestrol	56-53-1
T1215	Nicardipine hydrochloride	54527-84-3
T1214	Ribostamycin sulfate	53797-35-6
T1213	Piperacillin sodium salt	59703-84-3
T1212	Ketorolac tromethamine salt	74103-07-4
T1211	Levosulpiride	23672-07-3
T1210	Sodium etidronate	7414-83-7
T1209	Flunixin meglumin	42461-84-7
T1208	Citicoline sodium	33818-15-4
T1207	Lovastatin	75330-75-5
T1205	Chloramphenicol	56-75-7
T1204	Bendroflumethiazide	73-48-3
T12039	Miglustat	72599-27-0
T1203	Nadolol	42200-33-9
T1201	Sulpiride	15676-16-1
T1199	Mitotan	53-19-0
T1198	Tetracaine hydrochloride	136-47-0
T1197	Trimebutine maleate	34140-59-5
T1193	Clomifene citrate	50-41-9
T1192	Protoporphyrin IX	553-12-8
T1191L	Dipyron	68-89-3
T1191	Analgin	5907-38-0
T1190	Cefmenoxime hydrochloride	75738-58-8
T11897	Telotristat ethyl	1033805-22-9
T1189	Milnacipran hydrochloride	101152-94-7
T1188	Mizoribine	50924-49-7
T1187	Bifonazole	60628-96-8
T1186	Ifenprodil Tartrate	23210-58-4
T1185	Rofecoxib	162011-90-7
T1184	Rivaroxaban	366789-02-8
T1183	Retinol	68-26-8
T1182	Propionyl-L-carnitine hydrochloride	119793-66-7
T1181	Gefitinib	184475-35-2
T1180	Blonanserin	132810-10-7
T1179	Tiotropium bromide	136310-93-5
T1178	Temozolomide	85622-93-1
T1176	Racecadotril	81110-73-8
T1175	Bromopride	4093-35-0
T1174	Topotecan hydrochloride	119413-54-6
T1173	Tropisetron hydrochloride	105826-92-4
T1172	Diclazuril	101831-37-2
T1171	Methylprednisolone	83-43-2
T1170	Olopatadine hydrochloride	140462-76-6
T1169	Moguisteine	119637-67-1
T1168	Desonide	638-94-8
T1167	Cyproterone acetate	427-51-0
T1165	Ethinamide	536-33-4
T1163	Betamethasone 17-valerate	2152-44-5
T1162	Acipimox	51037-30-0
T1161	Protionamide	14222-60-7
T1160	Fusidine	6990-06-3
T1159	Leflunomide	75706-12-6
T1158	Phenoxybenzamine hydrochloride	63-92-3
T1157	Moxidectin	113507-06-5
T1156	Palonosetron hydrochloride	135729-62-3
T1155	Mebendazole	31431-39-7
T1154	Rifaximin	80621-81-4
T1153	Trimethoprim	738-70-5
T1152	Albendazole	54965-21-8
T1151	Roxithromycin	80214-83-1
T1149	Fenofibrate	49562-28-9
T1148	Menbutone	3562-99-0
T1147	Chlorhexidine hydrochloride	3697-42-5
T1146	Nifedipine	21829-25-4
T1145	Diminazene Aceturate	908-54-3
T1144L	Lidocaine Hydrochloride hydrate	6108-05-0
T1144	Lidocaine hydrochloride	73-78-9
T1143	Carbenicillin disodium	4800-94-6
T1142	Clindamycin phosphate	24729-96-2
T1141	Fenbendazole	43210-67-9
T1139	Salbutamol	18559-94-9
T1138	Taurocholic acid sodium salt hydrate	345909-26-4
T1137	Clorsulon	60200-06-8
T1135	Vitamin D3	67-97-0
T1134	Clofoctol	37693-01-9
T1133	Nimesulide	51803-78-2
T1132	Nicergoline	27848-84-6
T1129	Benfotiamine	22457-89-2
T1128	Oxiracetam	62613-82-5
T1127	Beclomethasone dipropionate	5534-09-8
T1126	Penicillin V potassium salt	132-98-9
[truncated: 979 more rows]
